1 **The formation of microbial exoskeletons is driven by a controlled calcium-**  
2 **concentrating subcellular niche**

3 Alona Keren-Paz<sup>1\*</sup>, Malena Cohen-Cymerknoh<sup>2\*</sup>, Dror Kolodkin-Gal<sup>3\*</sup>, Shani  
4 Peretz<sup>1</sup>, Iris Karunker<sup>1</sup>, Sharon G. Wolf<sup>4</sup>, Tsviya Olender<sup>1</sup>, Sergey Kapishnikov<sup>4</sup>,  
5 Vlad Brumfield<sup>4</sup>, Simon Dersch<sup>5</sup>, Elena Kartvelishvily<sup>4</sup>, Peninnah Green-Zelinger<sup>1</sup>,  
6 Damilola Isola-Adeyanju<sup>1</sup>, Ronit Suissa<sup>1</sup>, Michal Shteinberg<sup>6</sup>, Daniel McLeod<sup>7</sup>,  
7 Marianna Patrauchan<sup>7</sup>, Gideon Zamir<sup>3</sup>, Assaf Gal<sup>8</sup>, Peter L. Graumann<sup>5</sup>, Eitan  
8 Kerem<sup>2\*\*</sup>, and Ilana Kolodkin-Gal<sup>1\*\*</sup>

9 <sup>1</sup> Department of Molecular Genetics, Weizmann Institute of Science, Rehovot,  
10 Israel

11 <sup>2</sup> Pediatric Pulmonary Unit, Hadassah-Hebrew University Medical Center,  
12 Jerusalem, Israel

13 <sup>3</sup> Department of Experimental Surgery, Hadassah-Hebrew University Medical  
14 Center, Jerusalem, Israel

15 <sup>4</sup> Chemical Research Support, Weizmann Institute of Science, Rehovot, Israel

16 <sup>5</sup> Centre for Synthetic Microbiology (SYNMIKRO), and Fachbereich Chemie,  
17 Philipps-Universität Marburg, Marburg, Germany.

18 <sup>6</sup> Pulmonology Institute and CF Center, Carmel Medical Center, Haifa, Israel

19 <sup>7</sup> Department of Microbiology and Molecular Genetics, Oklahoma State University,  
20 Stillwater, OK, USA

21 <sup>8</sup> Department of Plant and Environmental Sciences, Weizmann Institute of  
22 Science, Rehovot, Israel

23

24 \* Equal Contribution

25 \*\* Corresponding authors: [Ilana.kolodkin-gal@weizmann.ac.il](mailto:Ilana.kolodkin-gal@weizmann.ac.il);  
26 [EitanK@hadassah.org.il](mailto:EitanK@hadassah.org.il)

27

28 **Abstract**

29 In nature, bacteria reside in biofilms - multicellular differentiated communities held  
30 together by extracellular matrix. In this work, we identified a novel subpopulation  
31 essential for biofilm formation – mineral-forming cells. This subpopulation contains  
32 an intracellular calcium-accumulating niche, in which the formation of a calcium  
33 carbonate mineral is initiated. As the biofilm colony develops, this mineral grows  
34 in a controlled manner, forming a functional macrostructure that serves the entire  
35 community.

36 The molecular mechanisms promoting calcite scaffold formation were conserved  
37 between three distant phyla – the Gram-positive *Bacillus subtilis*, Gram-  
38 negative *Pseudomonas aeruginosa* and the actinobacterium *Mycobacterium*  
39 *abscessus*. Biofilm development of all three species was similarly impaired by  
40 inhibition of calcium uptake and carbonate accumulation. Moreover, chemical  
41 inhibition and mutations targeting mineralization both significantly reduced the  
42 attachment of *P. aeruginosa* to the lung, as well as the subsequent damage  
43 inflicted by biofilms to lung tissues, and restored their sensitivity to antibiotics.

44 The evolutionary conserved cellular pathway controlling the fundamental feature  
45 of biofilm development uncovered in this work offers novel druggable targets for  
46 antibiotics to combat otherwise untreatable biofilm infections.

47

48

49

50

51

52

53

54

55

## 56 **Introduction**

57 While bacteria have been historically studied in homogeneous monocultures, in  
58 natural ecosystems and in clinical settings they are typically found in interface-  
59 associated multicellular communities called biofilms (Kolter and Greenberg, 2006).  
60 It was recently indicated that in soils, oceans, the deep subsurface, phyllosphere  
61 and animal microbiomes, 40–80% of bacteria reside in biofilms (Flemming and  
62 Wuertz, 2019). Bacterial biofilms are differentiated communities, in which the cells  
63 are held together by extracellular matrix. The formation of a biofilm is frequently  
64 favored over free-living planktonic life-style, as it increases the fitness of member  
65 cells promoting their survival, such as better attachment to hosts, division of  
66 metabolic labor and protection from the environment.

67 Microbial biofilms are of extreme clinical importance, as they are associated with  
68 many persistent and chronic infections (Costerton et al., 1999). A prominent  
69 feature of biofilms is their inherent resistance to the immune system and to  
70 antibiotics (Bryers, 2008; Bucher et al., 2019; Hill et al., 2005) – biofilm cells are  
71 up to 1,000 times more tolerant than planktonic bacteria (Bryers, 2008), making  
72 the eradication of biofilm infections with currently available antibiotics extremely  
73 challenging.

74 For example, the commensal/aquatic bacterium *Pseudomonas aeruginosa* can  
75 cause devastating chronic biofilm infections in compromised hosts, such as cystic  
76 fibrosis (CF) patients and those with burn wounds or implanted medical devices  
77 (Costerton et al., 1999). Respiratory infections with *P. aeruginosa* are a leading  
78 cause of morbidity and mortality in patients with CF (Yoon and Hassett, 2004).  
79 Once a chronic infection with *P. aeruginosa* is established, it is almost  
80 impossible to eradicate (Cohen-Cymerknoh et al., 2016). Similarly, the biofilms  
81 of *Mycobacterium abscessus* cause infections of respiratory tract, skin and central  
82 nervous system in patients with CF and chronic obstructive pulmonary disease  
83 (Caimmi et al., 2018).

84 A hallmark of biofilms is their ability to form robust and complex 3D structures, and  
85 the distinctive spatial organization provides the residing bacteria with several

86 benefits. The biofilm architecture was suggested to relieve metabolic stress. For  
87 example, channels formed below the ridges and wrinkles within the colony may  
88 facilitate diffusion of fluids, nutrients and oxygen (Bloom-Ackermann et al., 2016;  
89 Dietrich et al., 2013; Kolodkin-Gal et al., 2013; Wilking et al., 2013). Furthermore,  
90 cells located in different areas of the colony are exposed to different levels of  
91 oxygen, nutrients and quorum sensing molecules, which affect the genetic  
92 programs they express, promoting differentiation (Asally et al., 2012; Hassanov et  
93 al., 2018; Liu et al., 2015; Monds and O'Toole, 2009; Serra and Hengge, 2014;  
94 Stewart and Franklin, 2008). Thus, community structure allows the genetically  
95 identical biofilm cells to display phenotypic heterogeneity and to endure stressful  
96 environments. Due to physical protection offered by the biofilm biomass,  
97 differentiation and physiological adaptations, cells residing deep within the biofilm  
98 are protected from environmental assaults, such as antibiotics. Biofilm colonies are  
99 a compelling model system for biofilm development, and many basic biological  
100 processes of high relevance to bacterial pathogenicity were first discovered in this  
101 well-controlled and robust system (Colvin et al., 2012; Dietrich et al., 2008; El  
102 Mammeri et al., 2019; Hufnagel et al., 2018; Jo et al., 2017; Richards et al., 2019;  
103 Serra et al., 2013; Steinberg et al., 2020; Wermser and Lopez, 2018).

104 Until recently, the ability of biofilm-forming bacteria to generate complex  
105 architectures was attributed exclusively to self-produced **organic** extracellular  
106 matrix (ECM) (Dragos and Kovacs, 2017; Reichardt and Parsek, 2019; Steinberg  
107 and Kolodkin-Gal, 2015), composed of carbohydrate-rich polymers (i.e., lipids or  
108 exopolysaccharides), proteins, and nucleic acids (Branda et al., 2005). However,  
109 we and others have recently shown that microbial biofilms contain an organized  
110 internal mineral structure, composed of crystalline calcium carbonate (calcite), that  
111 also contributes to their 3D morphology (Keren-Paz et al., 2018; Keren-Paz and  
112 Kolodkin-Gal, 2020; Li et al., 2015).

113 Formation of minerals is known to be induced in bacterial biofilms, through passive  
114 surface-mediated processes promoted by by-products of bacterial metabolism.  
115 Biologically induced minerals associated with bacteria include oxides of Fe, Mn,

116 and other metals; metal sulfates and sulfites; phosphates and carbonates; and Fe  
117 and Fe-Al silicates (Frankel and Bazylinski, 2003). Of all examples of  
118 biomineralization, microbial induced calcium carbonate precipitation (MICCP) is  
119 most frequently associated with microbial communities (Weiner and Dove, 2003),  
120 (Douglas and Beveridge, 1998). In geological settings, bacterial metabolic  
121 processes, such as urea hydrolysis by urease-positive bacteria, increase local  
122 concentration of bicarbonate and elevate pH. When enough environmental  
123 calcium is present, those changes promote spontaneous precipitation of calcium  
124 carbonate, with bacterial envelopes serving as nucleation sites for the growing  
125 mineral, leading to formation of crystalline calcium carbonate (Dhami et al.,  
126 2013). Similar processes were also suggested to promote biofilm-associated  
127 calcification of *Proteus mirabilis* on catheters (Morris and Stickler, 1998), and  
128 during dual-species biofilm formation (Li et al., 2016b) and to contribute to *P.*  
129 *aeruginosa* virulence in an insect host (Lotlikar et al., 2019). In both clinical and  
130 environmental scenarios, calcium deposition in biofilms was mostly seen as an  
131 uncontrolled and unintentional byproduct of bacterial metabolic activity.

132 Recently, intracellular amorphous calcium carbonate (ACC) granules were  
133 detected in some species of Gram-negative autotrophic bacteria (Blondeau et al.,  
134 2018). Those intracellular deposits were suggested to contribute to single cell  
135 energy metabolism by promoting photosynthesis (Blondeau et al., 2018), or  
136 chemolithoautotrophy (Monteil et al., 2020). While the precise molecular  
137 mechanisms regulating this process are still unresolved, the presence of a  
138 microcompartment dedicated to mineralization raises the possibility that some  
139 bacteria might be capable of controlling the formation of biogenic mineral.

140 Our recent discovery of precisely organized mineral macrostructures within  
141 biofilms suggests that biomineralization in biofilms is tightly controlled. These  
142 calcite 'skeletons' contributed to fitness of biofilm colonies in two unrelated soil  
143 bacteria: *Bacillus subtilis* and *Mycobacterium smegmatis* (Keren-Paz et al.,  
144 2018; Oppenheimer-Shaanan et al., 2016). For both, the mineral structure acted  
145 as a structural scaffold supporting the 3D architecture of the colony, and as

146 diffusion barrier preventing the penetration of solutes into the biofilms. The  
147 formation of controlled calcium carbonate macrostructures in phylogenetically  
148 distinct heterotrophic biofilms raises the possibility that the function of calcium  
149 carbonate is not limited to specific species utilizing it for intracellular chemical  
150 energy, but is instead a general phenomenon wide-spread in the bacterial  
151 kingdom.

152 Those reports challenge the current view of biofilm development as a process  
153 depending solely on organic ECM production. They raise several fundamental  
154 questions regarding the developmental role of mineral skeleton formation within  
155 a bacterial community, and the relation between structure and function in  
156 microbial biofilms. If indeed mineralization is a controlled process resulting in a  
157 structure crucial to biofilm development and function, this is a novel aspect of  
158 basic biofilm biology. What is the role of mineral structure in the development of  
159 differentiated biofilm community? Are there dedicated ‘osteoblast-like’ cells  
160 initiating mineral production? What are the fitness advantages that the mineral  
161 exoskeleton confers to the community? Furthermore, organic matrices and their  
162 regulation differ between different organisms (Steinberg and Kolodkin-Gal,  
163 2015). However, the formation of calcium carbonate relies on a highly conserved  
164 building blocks, calcium and carbonate, generated from carbon dioxide in most  
165 heterotopic organisms. Therefore, the generation of mineral scaffolds could be  
166 common and conserved across the bacterial domain, contributing to the  
167 phenotypical resistance of diverse microbial biofilms. If so, understanding the  
168 underlying molecular mechanisms of biofilm mineralization is a crucial step  
169 towards our ability to successfully combat biofilm infections.

170 In this work, we discovered that the calcium-dependent 3D organization of the  
171 biofilm colony leads to transcriptional reprogramming of the bacterial community,  
172 and was essential for biofilm development. Calcite formation and the assembly  
173 of a functional mineralized macro-skeleton supporting the 3D morphology of a  
174 biofilm colony was associated with defined intracellular calcium-rich deposits  
175 present in a distinct subpopulation of biofilm cells, differing from flagellin and

176 organic ECM producers. Calcite formation turns out to be an extremely  
177 conserved process, occurring not only in the beneficial model organism *B.*  
178 *subtilis*, but also in two unrelated lung pathogens – *P. aeruginosa* and *M.*  
179 *abscessus*. Inhibition of key biomineralization enzymes or calcium uptake  
180 prevented biofilm formation by both pathogens. We were able to identify calcite  
181 in sputum samples taken from CF patients, suggesting that this conserved  
182 process is of clinical importance. Finally, in an *ex vivo* lung model, chemical and  
183 genetic inhibition of calcium uptake and of carbonate accumulation blocked  
184 biofilm formation and lung colonization, preventing damage inflicted by *P.*  
185 *aeruginosa* to lung tissues, and sensitized *P. aeruginosa* to antibiotic treatment.

186 Taken together, our results identify a previously overlooked process essential for  
187 bacterial biofilm development – **the tightly regulated formation of mineral**  
188 **skeletons by dedicated cells**. Its conservation across the bacterial kingdom  
189 highlights the fundamental role it plays in biofilm biology, and could lead to novel  
190 therapeutic approaches for combating a broad range of persistent biofilm  
191 infections.

192

## 193 **Results**

194 In a previous work, we demonstrated that *B. subtilis* biofilm morphology is calcium-  
195 dependent (Oppenheimer-Shaanan et al., 2016). Removing calcium acetate from  
196 the undefined biofilm-promoting B4 medium prevented the development of the  
197 complex 3D architecture characteristic of a biofilm colony, without affecting  
198 bacterial growth. This 3D structure required calcium (as no equivalent cation could  
199 replace it and as it was induced by various calcium salts) and metabolically  
200 produced carbonate (as it was eliminated under anaerobic conditions and  
201 increased in CO<sub>2</sub>-enriched environment). The mineral component was identified  
202 as calcite by FTIR and XRD (Supplementary Fig. 1, (Oppenheimer-Shaanan et al.,  
203 2016). It spanned the entire colony and was spatially co-localized with colony  
204 wrinkles, suggesting it acted as a “scaffold” supporting them (Oppenheimer-  
205 Shaanan et al., 2016). The mineral structure developed and increased over time

206 as the colony grew (Keren-Paz et al., 2018). Finally, as the biofilm colonies aged  
207 and their 3D spatial structure diminished, the internal and organized mineral  
208 deteriorated (potentially due to fermentation and acidification of the medium by  
209 oxygen-depleted cells within the inner mass of the aging biofilm), and only large  
210 non-structural crystals were left in the colony periphery due to a passive growth of  
211 calcite crystals (Oppenheimer-Shaanan et al., 2016). During biomineralization, the  
212 formation of exopolysaccharides and the amyloid protein TasA was also essential  
213 to form complex morphology, and interactions between the organic and inorganic  
214 matrix were evident (Oppenheimer-Shaanan et al., 2016).

215 To better understand the molecular mechanisms underlying the formation of  
216 functional mineral macrostructures, we examined the effect of calcium on gene  
217 expression in a *B. subtilis* biofilm colony by sequencing the transcriptome of  
218 colonies grown either with or without excess calcium (Fig. 1A). The addition of  
219 calcium resulted in a dramatic reprogramming of the transcriptional profile of the  
220 colony, with 20% of the genome (n=875) significantly changing between the two  
221 conditions at all time-points tested (Supplementary File 2). Only in the presence of  
222 added calcium, specific developmental processes defining the biofilm state, such  
223 as induction of ECM production and sporulation, and the repression of motility,  
224 were observed (Fig. 1B). These fundamental changes were mostly sustained over  
225 time (Fig. 1C). We next compared the two transcriptional signatures to a collection  
226 of published data, containing 269 mRNA profiles of *B. subtilis* grown under over  
227 100 different conditions (Nicolas et al., 2012) (Fig. 1D). The transcriptome of cells  
228 grown with excess calcium was similar to that of previously analyzed biofilm cells,  
229 regardless of the biofilm promoting medium used. On the other hand, the  
230 transcription profile of colonies grown without added calcium was similar to that of  
231 planktonic cells experiencing nutrient starvation, but was not identified as biofilm  
232 in this unbiased analysis.

233 These findings highlight the central role of calcium in biofilm development, and  
234 suggest an intimate connection between biofilm structure and function - raising the  
235 possibility that microbial cells are actively regulating calcium carbonate  
236 biomineralization. Indeed, when a biofilm colony was visualized by scanning



237 electron microscopy (SEM), we observed a highly mineralized subpopulation of  
238 cells, tightly associated with mineral crystals (Fig. 1E, Supplementary Fig. 2).  
239 Consistently with our previous characterization of bleached biogenic calcite, the  
240 unbleached crystals had rough faces, along with a smooth and flat crystal face and  
241 displayed elongated prismatic morphology instead of the rhombohedral  
242 morphology of calcite grown in pure solution (Oppenheimer-Shaanan et al., 2016).

243 The crystals were consistent with biogenic calcite generated by *B. subtilis*  
244 (Oppenheimer-Shaanan et al., 2016), as judged by shape; backscatter mode and  
245 energy dispersive X-ray spectroscopy (EDX) (Fig. 1F, Supplementary Fig. 2). In  
246 the absence of added calcium, mineral crystals were rarely detected  
247 (Supplementary Fig. 3). Mineral producers were not associated with organic ECM,  
248 did not carry flagella, and did not sporulate (Figures 1E, Supporting Figures 2 and  
249 3), and therefore morphologically differed from previous subpopulations observed  
250 in *B. subtilis* biofilms (Vlamakis et al., 2008). To create the 3D reconstruction, a  
251 whole, unfixed bacterial colony was transferred to a plastic slide for a microCT  
252 scan, and rotated between the X-ray source and the detector positioned at optimal  
253 distances for a voxel size of 0.87  $\mu\text{m}$ . 2D projections were taken at different angles  
254 until a full rotation ( $360^\circ$ ) was completed. The full set of images was then used to  
255 reconstruct the whole volume of the sample by back projection algorithm and thus  
256 a high-resolution 3D image was generated (see Supplementary Movie 1). This  
257 microCT X-ray scan confirmed that calcite is organized in a macro-structure,  
258 generating a non-uniform continuous layer throughout the wrinkles (Fig. 1G).

259 One possible mechanism linking calcium mineralization and colony structure is  
260 that, in the presence of calcium, some kind of specialized cells located in specific  
261 regions of the colony, would serve as nucleation sites and promote localized  
262 mineral formation. The observed induction of sporulation regulon transcription by  
263 calcium (Fig. 1B) raised the possibility that spores could serve this function,  
264 possibly due to unique membrane properties of the spore. However, a mutant  
265 strain lacking sporulation sigma factor SigF (de Hoon et al., 2010), which does not  
266 form spores and is blocked early during sporulation, was able to form highly  
267 structured colonies, in a calcium-dependent manner (Supplementary Fig. 4),

268 suggesting that biomineralization promotes biofilm development and sporulation,  
269 and not *vice versa*.

270 The tight association of calcium carbonate mineral with the bacterial cells led us to  
271 examine the role of intracellular calcium. Disruption of intracellular calcium  
272 homeostasis by a chemical inhibitor of P-type ATPases sodium metavanadate  
273 (SMV) (Clausen et al., 2016; Guragain et al., 2013; Kuhlbrandt, 2004), prevented  
274 the formation of a complex 3D structure even in the presence of excess calcium  
275 (Fig. 1H). This morphological defect was not due to inhibition of planktonic growth,  
276 which was only mildly affected by SMV (Fig. 1I). This need for controlled  
277 intracellular calcium levels raised the possibility that carbonate mineralization  
278 starts intracellularly. Therefore, we next examined single cells from biofilms grown  
279 with excess calcium.

280 3D reconstructions of cryo-fixed bacteria with scanning transmission electron  
281 tomography (CSTET) (Wolf et al., 2014) (Fig. 2A-B) revealed calcium dense foci  
282 inside the cells, associated with the membrane. CryoSTEM imaging and cryo-EDX  
283 measurements verified excess calcium in these deposits (Supplementary Fig. 5).  
284 The appearance of these deposits was calcium dependent, as we could not  
285 observe them in cells grown without added calcium (Supplementary Fig. 6). While  
286 the mineral producing sub-population was small, it was enriched in the structured  
287 zones of the colony (Fig. 2C). Next, we examined the distribution of cellular calcium  
288 levels within the biofilm community. We stained live biofilm cells with calcein-AM –  
289 a dye that can be used for visualization of intracellular calcium in live cells (Hale et  
290 al., 2000). This lipophilic stain can freely enter the cells, but only binds calcium and  
291 becomes fluorescent after the acetoxymethyl (AM) groups are removed by cellular  
292 esterases. Gated-STED fluorescent microscopy revealed heterogeneity in cellular  
293 calcium levels within the biofilm colony, with most cells containing low levels of  
294 calcium, while a smaller fraction contained very high levels (Fig. 2D). The number  
295 of cells showing a strong calcein signal increased during biofilm development, as  
296 the calcified structures matured. While the cytoplasm of most cells was stained  
297 evenly, a small fraction of cells (2.6% out of 300 cells examined) displayed  
298 concrete, membrane-localized calcium deposits (Fig. 2E), comparable in their

299 frequency, distribution and localization with calcium deposits identified by CSTET  
300 (Fig. 2A-C). Consistent with our previous observation, sporulation does not seem  
301 to be involved in cellular calcium deposition – as  $\Delta sigF$  cells contained calcium-  
302 rich foci similar to those of wild type (Supplementary Fig. 7). Furthermore, we could  
303 detect such deposits associated with the cell envelope on the cytoplasm side,  
304 embedded within the membrane, and closely associated with the cell from the  
305 outside – suggesting different stages of export (Fig. 2F). Similar calcium deposits  
306 were also observed by CSTET in close association with the outer membrane of  
307 bacterial cells (Fig. 2G). Taken together, those finding support the existence of a  
308 calcium-concentrating compartment in a subpopulation of heterotrophic biofilm  
309 cells, similar to that recently discovered in autotrophic bacteria (Blondeau et al.,  
310 2018), and that the mechanism for its formation involves an active and regulated  
311 calcium uptake, as well as the export of the stored calcium (Fig.2F).

312 In *B. subtilis*, the transcriptional regulation of calcium uptake is poorly  
313 characterized. We therefore examined the potential involvement of several general  
314 transcriptional regulators of cation uptake. Non-ferric metal homeostasis in  
315 bacteria is regulated by the MntR, MerR and ArsR families of transcriptional  
316 regulators (Moore and Helmann, 2005). Strains lacking *arsR*, *mntR* and *zur*  
317 developed robust and structured biofilm colonies. In contrast, *cueR* mutant had a  
318 severely altered biofilm phenotype and formed completely flat colonies (Fig. 2H).  
319 CSTET analysis was suggestive of diminished calcium-concentrating population  
320 (a maximum of 1.3% compared with 4% of the wild type, n=149). CueR is a poorly  
321 characterized transcriptional regulator belonging to the metal-responsive MerR  
322 family (Moore and Helmann, 2005). CueR binds the promoter of copper  
323 transporting P-type ATPase CopA, but a deletion of *copA* had no effect of biofilm  
324 morphology (Supplementary Fig. 8). The effect on biofilm morphology was also not  
325 due to reduction in growth of *cueR* mutant (Supplementary Fig. 9). Those  
326 observations raise the possibility that CueR regulates additional, yet undiscovered,  
327 P-type ATPase, involved in calcium uptake. To characterize the regulon of CueR,  
328 we repeated the transcriptome analysis of the wild-type strain and of *cueR* mutant,  
329 both grown in the presence of calcium. When compared to the wild type colony,

330 the expression of matrix genes was upregulated and motility was inhibited in the  
331 *cueR* mutant, suggesting a general dis-regulation of biofilm transcriptional profile  
332 (Fig. 2I). Biofilm formation is a tightly regulated developmental process, and both  
333 inhibition and overexpression of key components is known to cause severe defects  
334 in biofilm development (for example, both deletion and over-activation of the biofilm  
335 regulator Spo0A prevent normal biofilm development (Veening et al., 2006). High  
336 levels of ECM gene expression further indicates that the featureless morphology  
337 of the *cueR* mutant is not a result of the lack of organic ECM components. The  
338 subsequent analysis of the expression of divalent cation transporters revealed that  
339 their expression is significantly altered in *cueR* mutant, while other transporters are  
340 less affected (Fig. 2I). Among those, we identified three calcium transporters with  
341 transcriptional levels significantly changed in the mutant: *yloB* (ATP-driven  $\text{Ca}^{2+}$   
342 pump) (Gupta et al., 2017), *chaA* ( $\text{H}^+/\text{Ca}^{2+}$  exchanger) (Fujisawa et al., 2009) and  
343 *yetJ* (pH-dependent calcium leak channel) (Chang et al., 2014) (Supplementary  
344 File 2). Deletion of *yloB* (but not *chaA*, *yetJ*, or both) was sufficient to prevent 3D  
345 colony morphology formation, indicating the importance of calcium uptake and  
346 homeostasis (Fig. 2J and Supplementary Fig. 10).

347 Taken together, these observations suggest that the first critical step in the  
348 formation of calcite mineral is initiated in saturated mineral precursor  
349 microenvironments within the cell. After the initial nucleation, the precursor seems  
350 to be exported out of the bacterial cell without hampering the membrane integrity  
351 of its producer, and to further grow on organic ECM templates in the highly complex  
352 biofilm microenvironment, until an organized functional mineral macro-structure is  
353 formed.

354 The organic ECM components and the molecular mechanism governing  
355 transition from planktonic life style to the biofilm state vary immensely between  
356 phylogenetically distant bacteria, making a development of broad range drugs  
357 specifically targeting biofilms challenging. In this sense, biomineralization is an  
358 extremely appealing target, as it relies on simple and conserved mechanisms  
359 allowing accumulation of calcium and carbonate. We have recently reported that,  
360 like *B. subtilis*, the biofilm colonies of soil actinobacterium *M. smegmatis* contain

361 functional mineral macro-structures (Oppenheimer-Shaanan et al., 2016). One  
362 additional study provided evidence for some spatial organization of calcium  
363 carbonate mineral in submerged biofilms formed by the Gram-negative  
364 pathogen *P. aeruginosa* (Li et al., 2016a). This led us to explore whether we can  
365 detect regulated formation of functional mineral structures in pathogenic biofilm  
366 colonies.

367 When grown on biofilm-inducing agar, *P. aeruginosa* PA14 forms complex  
368 colonies with a highly characteristic morphology, which were shown to be  
369 dependent on polysaccharides encoded by the *pel* operon (Colvin et al., 2011)).  
370 However, like in *B. subtilis*, these complex 3D structures were co-localized with  
371 spatially organized mineral, as determined by microCT (Fig. 3A), were abolished  
372 by the cation chelator EDTA and EGTA, and could be restored by addition of  
373 excess calcium (Fig. 3B, C). 3D reconstruction confirmed that the densest mineral  
374 areas formed non-continuous layer correlated with colony wrinkles (Fig. 3D),  
375 further suggesting that the 3D structure of *P. aeruginosa* biofilms likely relies on  
376 the formation of calcite mineral scaffolds. The formation of elaborate calcium-  
377 dependent 3D morphology was conserved in an additional strain of *P. aeruginosa*  
378 PA01 (Supplementary Fig. 11). The mineral and exopolysaccharides were both  
379 essential for structure formation, as a mutant for both *pel* and *psl* operons was flat  
380 and featureless, similarly to biofilms grown in the presence of a calcium chelator  
381 (Supplementary Fig. 12).

382 To indicate whether the formation of mineral scaffolds is a conserved process of  
383 significant clinical potential, we tested whether it occurs in another,  
384 phylogenetically distant, drug-resistant pathogen. We therefore examined the  
385 biofilms of *M. abscessus*, which are held together by extracellular matrix  
386 consisting of mycolic acids (Halloum et al., 2016), which bear little resemblance  
387 to EPS components of *B. subtilis* and *P. aeruginosa*. Nevertheless, this  
388 bacterium also only formed colonies of complex morphology in the presence of  
389 calcium (Fig. 3E). Fourier-transform infrared spectroscopy (FTIR) detected  
390 calcium carbonate mineral in the colony (Supplementary Fig. 13), and X-Ray  
391 analysis revealed that the densest mineral areas were co-localized with colony

392 wrinkles (Fig. 3F), just like in *B. subtilis* and *P. aeruginosa* colonies. In addition  
393 to the organized macro-scale structures present throughout the colony, over  
394 time large crystals also formed beneath the colony and in its periphery,  
395 reminiscent of crystals passively precipitated in the vicinity of *B. subtilis* colonies  
396 at later stages. All the bacteria we tested formed mineral macrostructures in a  
397 slightly basic-neutral macro pH (Supplementary Fig. 14). Under such conditions,  
398 passive mineral precipitation is unlikely, supporting a potential biological  
399 regulation of mineralization.

400 The cellular pathways of biomineralization present in all three bacteria are  
401 strikingly conserved (Fig. 4A), and can be inhibited at several points. The role of  
402 urease and carbonic anhydrase (CA) in biomineralization is well established  
403 (Jansson and Northen, 2010; Phoenix and Konhauser, 2008). The consequent  
404 action of those enzymes increases local bicarbonate levels, and at the same  
405 time increases the pH, creating an environment favorable to mineral  
406 precipitation. In the section above, we have shown that intracellular calcium was  
407 needed for calcite formation. Consistent with the central role of calcite scaffolds  
408 in supporting biofilm morphology, inhibition of urease, CA, and especially P-type  
409 ATPases, disrupted *P. aeruginosa* biofilm morphology (Fig. 4B) and abolished  
410 the mineral macrostructures as judged by microCT X-Ray (Supplementary Fig.  
411 15). This effect could not be explained by inhibition of planktonic growth, which  
412 was mostly unaffected (Fig. 4C, Supplementary Fig. 16). Similarly, reducing self-  
413 produced and atmospheric carbon dioxide reduced the mineral macrostructure  
414 (Supplementary Fig. 17).

415 Inhibition of complex calcium-dependent colony formation, but not planktonic  
416 growth, was also observed in mutants lacking two or more carbonic anhydrase  
417 genes or a calcium transporter CalC (Fig. 4D). Biofilm formation on polystyrene,  
418 as quantified by crystal violet staining, was also severely compromised by either  
419 chemically or genetically impairing carbonate formation or calcium uptake (Fig.  
420 4E-F). The fact that SMV addition or CalC deletion could prevent 3D morphology  
421 development and biofilm formation, but had little effect on planktonic growth, is

422 consistent with our view that carbonate mineralization in biofilms relies on  
423 regulation of intracellular calcium homeostasis.

424 Potentially broad clinical implication of these findings was supported by testing  
425 the same chemical inhibitors on *M. abscessus*. Colony morphology could be  
426 compromised by inhibiting biomineralization enzymes (Fig. 4G and  
427 Supplementary Fig. 19). Morphology defects could not be explained by inhibition  
428 of cell growth, as most potent morphology inhibitors AHA and SMV had the  
429 smallest effect on planktonic growth (Fig. 4G). We could therefore conclude that  
430 biomineralization is indeed highly conserved, and is mediated by a previously  
431 untargeted druggable pathway.

432 Biofilm mineralization was not previously demonstrated in the lung  
433 microenvironment. To test the ability of lung pathogens to form structured  
434 communities in such conditions, we grew *M. abscessus* and *P. aeruginosa* on  
435 synthetic CF sputum medium (SCFM). Both species were capable to form highly  
436 organized 3D colonies on SCFM (Supplementary Fig. 20). For *P. aeruginosa*, this  
437 robust colony architecture was enhanced by addition of calcium to the growth  
438 medium, and diminished with the addition of calcium chelator EGTA (Fig. 4H);  
439 suggesting that biofilms may rely on crystalline calcium carbonate scaffolds to  
440 support the community architecture in the lung. Therefore, we examined whether  
441 calcite formation by lung pathogens could be also observed in clinical samples.  
442 We collected sputum samples from CF patients chronically infected with *P.*  
443 *aeruginosa* and removed the organic matter by bleach. Insoluble material  
444 indicating the presence of a mineral was found in 31 out of 50 samples examined  
445 (Supplementary Table 3). These putatively positive patients were further examined  
446 by FTIR for residual pure minerals, and spectra typical of calcite, lacking a  $\nu_1$  peak  
447 and containing a  $\nu_2$  peak at  $875\text{ cm}^{-1}$ ,  $\nu_3$  peak at  $1425\text{ cm}^{-1}$ , and  $\nu_4$  peak at  $713\text{ cm}^{-1}$   
448 (Supplementary Figure 21), were identified in 7 samples.

449 To further explore the role of biomineralization during lung infection by *P.*  
450 *aeruginosa*, we set up a lung *ex vivo* model. Organ cultures derived from lung and  
451 colon tissues have been applied previously for the study of biofilm infections and

452 viral tropism (Kolodkin-Gal et al., 2008; Kolodkin-Gal et al., 2007; Massler et al.,  
453 2011; Wu et al., 2021), and thus can potentially be used to study lung infections.  
454 We cultured mice lungs and then infected them with *P. aeruginosa* constitutively  
455 expressing GFP. Fluorescent microscopy revealed biofilms forming on the tissue  
456 prior to its destruction (Supplementary Fig. 22). Using this system, we then tested  
457 the effect of chemically blocking biomineralization during initial infection stages.  
458 When left untreated, *P. aeruginosa* infected tissue (labeled by DAPI for  
459 visualization) was completely deteriorated. Infection in the presence of urease  
460 inhibitor AHA prevented biofilm formation and rescued the lung tissue (Fig. 5A).  
461 While the tissue was rescued, the bacterial load in the growth media remained  
462 similar (Fig. 5B). This is consistent with the *in vitro* results presented above – as in  
463 all cases inhibition of biomineralization prevented biofilm formation, but had little  
464 effect on planktonic growth. This further strengthens our proposed hypothesis,  
465 suggesting biomineralization is a specific and controlled developmental feature of  
466 bacterial biofilms. To quantify the effects of urease inhibition during lung tissue  
467 infection, the tissue was stained with H&A and the nuclei were counted (Fig. 5C-  
468 D). We observed a significant rescue of the infected tissue by AHA, in a dose-  
469 dependent manner. In agreement with these findings, the growth of bacteria in the  
470 medium was not reduced by AHA addition, but their colonization of the lung tissue  
471 was largely compromised (Fig. 5E and 5F).

472 Significant reduction of lung cell death during infection by *P. aeruginosa* was also  
473 obtained with CA and calcium uptake inhibitors (Fig. 6A-C), and with mutants  
474 lacking CAs (Fig. 6D). Consistent with our observation that both Diamox and AHA  
475 inhibited lung colonization and subsequent cell death, the combination of both was  
476 additive (Figure 6E). At the concentrations used here, AHA and DTNB were slightly  
477 toxic to the uninfected lung tissue, while SMV and Diamox had no adverse effect  
478 (Supplementary Fig. 23). We can therefore conclude that the entire  
479 biomineralization pathway, rather than a specific enzyme, is of crucial importance  
480 to host infection.

481 Finally, while the ability to rescue host tissue by inhibition of biomineralization is  
482 encouraging, in clinical settings the eradication of bacteria is essential. We



483 therefore tested whether inhibition of mineralization during lung infection of *P.*  
484 *aeruginosa* could increase its sensitivity to antibiotics. While neither  
485 biomineralization inhibitors nor quinolone antibiotics (a first-line antibiotic for  
486 treating *P. aeruginosa* infections) (Hewer and Smyth, 2017) could effectively  
487 eradicate established biofilms, the combination of both classes of drugs  
488 significantly increased the sensitivity of biofilms to treatment (Fig. 6F) – highlighting  
489 the potential clinical applications of biomineralization inhibition.

490

## 491 **Discussion**

492 Bacterial biofilms are widespread in nature, forming multicellular colonies on  
493 various surfaces. The molecular mechanisms guiding the complex network of  
494 events leading to the transition from a free-living planktonic bacterium to the  
495 differentiated community are well characterized. Much is known about the  
496 production of organic matrix, the division of labor between the different cell  
497 types, the metabolic adaptations, the methods of communication between the  
498 community members – and the fitness advantages of such a communal life style  
499 are evident.

500 In addition, bacterial biofilms were extensively shown to promote biomineralization  
501 of metals (such as gold and iron), phosphate and carbonate (Phoenix and  
502 Konhauser, 2008). In this work, we uncover a previously overlooked, but  
503 fundamental, connection between the highly regulated biofilm development and  
504 the seemingly random biomineralization occurring within biofilms. We propose that  
505 bacterial communities actively control the formation of mineral macrostructures  
506 and that those “skeletons” play an important role in biofilm development and  
507 fitness.

508 Moreover, the conserved and wide-spread nature of biomineralization offers  
509 novel therapeutic approaches to target one of the most challenging global  
510 threats to human health – drug-resistant chronic biofilm infections.

511 The first clues to the presence of a structural mineral component in a biofilm  
512 came when we demonstrated that a mature 3D structure of biofilm colonies of *B.*  
513 *subtilis* depends on their ability to precipitate precisely organized patterns of  
514 calcium carbonate (Oppenheimer-Shaanan et al., 2016). A controlled deposition  
515 of a calcium carbonate scaffold structurally supports the complex architecture of  
516 biofilm colonies and protects them from the environment by limiting solute diffusion  
517 (Keren-Paz et al., 2018).

518 In this work, we build on those preliminary observations to show that crystalline  
519 calcium carbonate production is a controlled process fundamental to biofilm  
520 development. Only when calcification occurs, *B. subtilis* can successfully activate  
521 and maintain the characteristic biofilm transcriptional program, activating matrix  
522 production and sporulation while repressing motility (Fig. 1).

523 Mechanistically, the formation of mineral macro-structures is initiated within  
524 intracellular compartments of a small subpopulation of cells, which secrete small  
525 calcium-rich granules, while remaining intact (Fig. 2). The process is likely actively  
526 controlled, as the membrane integrity of the exporting cells is not compromised.  
527 Initiating mineral formation within the controlled cellular environment allows the  
528 organism to regulate the composition, structure, and physical properties of the  
529 mineral – therefore controlling the final function.

530 The best known example of bacteria producing functional minerals formed in a  
531 defined intracellular compartment by a highly regulated cellular pathway is the  
532 magnetotactic bacteria, forming invagination of membranes to generate  
533 magnetosomes (Komeili et al., 2006). Recently, intracellular calcium carbonate  
534 mineralization was reported in cyanobacteria (Blondeau et al., 2018) and in a  
535 subgroup of poorly characterized magnetotactic bacteria (Monteil et al., 2020).  
536 Unlike the above examples, which occur in a specific group of phylogenetically  
537 related planktonic aquatic bacteria, the formation of mineralized macrostructures  
538 in biofilms is conserved across the microbial domain, highlighting their potential  
539 importance for general microbial fitness, unrelated to specific adaptations of single-  
540 cell microbial metabolism.

541 Regulated calcification was found to mediate complex 3D biofilm structure in three  
542 phyla – the Gram-positive spore former *B. subtilis* and actinobacterium *M.*  
543 *abscessus*, and the Gram-negative *P. aeruginosa* (Fig. 3). The conserved nature  
544 of cellular pathways promoting biomineralization allowed us to prevent  
545 biomineralization in phylogenetically distinct bacteria by chemically and genetically  
546 inhibiting carbonate accumulation and calcium uptake (Fig. 4). These results  
547 support the notion that mineralization in biofilms is a well-defined developmental  
548 process, initiated by a dramatic change in the structure and function at the single  
549 cell level within a subpopulation of cells in bacterial biofilms. Similar to the  
550 formation of bones initiated by the osteoblast cells within higher animals, the  
551 presence of mineral-producing cells within a biofilm leads to the formation of a  
552 macrostructure serving specific functions and increasing the fitness of the  
553 microbial community.

554 In this work, we demonstrate that, in a subpopulation of cells, calcium uptake and  
555 functionally conserved pathways of carbonate production alter the intracellular  
556 microenvironment, promoting mineral nucleation and leading to formation of a  
557 mineral macro-structure. Numerous studies of *B. subtilis*, *P. aeruginosa* and  
558 additional biofilm formers, established that complex colony architecture is  
559 dependent on the organic extracellular matrix (Branda et al., 2005; Colvin et al.,  
560 2012; Jones and Wozniak, 2017; Kobayashi and Iwano, 2012; Romero et al., 2010;  
561 Vlamakis et al., 2013), and thus hypothesized that the presence of the organic  
562 ECM components is sufficient for bacterial biofilm morphogenesis. We found that  
563 non-organic ECM components are also necessary for the development of  
564 structured bacterial communities. While our results indicate that mineral formation  
565 initiates within the cells and requires a controlled intracellular environment, the final  
566 mineral macro-structure assembly has to occur in the extracellular  
567 microenvironment, guided by complex interactions with the extracellular organic  
568 matrix (Keren-Paz and Kolodkin-Gal, 2020), as indicated by the scanning electron  
569 microscopy (Figure 4C, (Oppenheimer-Shaanan et al., 2016)). Therefore, both  
570 organic ECM components and biogenic minerals are essential but not sufficient for  
571 the formation of complex structures.

572 While in our settings bacteria relied on calcite to generate functional scaffolds,  
573 other minerals may serve similar functions. For example, deposition of calcium  
574 phosphate crystals in *P. mirabilis*, *P. vulgaris* and *Providencia rettgeri* biofilms  
575 blocks catheters in infected patients (Broomfield et al., 2009; Mathur et al., 2006;  
576 Tan et al., 2018), and urease-dependent calcium phosphate mineralization was  
577 shown to increase *P. mirabilis* resistance to ciprofloxacin (Li et al., 2016c) and  
578 increase its survival in dual-species biofilms (Li et al., 2016b). Importantly, the  
579 physiological role of calcium phosphate deposits within these medical biofilms and  
580 whether dedicated cells facilitate this process remains to be determined.

581 Intriguingly, we could observe the presence of bacterially produced calcite  
582 minerals in the sputum of some CF patients infected with *P. aeruginosa*. This  
583 observation raises the possibility that lung pathogens can generate functional  
584 minerals within the host. While biofilm colonies formed on top of biofilm-inducing  
585 agar are a convenient model system mimicking many of the environmental and  
586 physical conditions of the host, it lacks the host itself. While several murine models  
587 are available for the study of CF (such as *Cftr*<sup>-/-</sup> knockout mice), they all fail to  
588 replicate the acute lung disease and chronic bacterial infections characteristic of  
589 CF patients (Semaniakou et al., 2018). *Ex vivo* organ cultures are an experimental  
590 system that recapitulates the three-dimensional structure of the tissue and includes  
591 several cell types and a variety of extracellular matrix components. On the other  
592 hand, organ culture is a controlled microenvironment lacking compounding factors  
593 that play a role in any infection, such as efficiency of drug delivery and the immune  
594 system (Kolodkin-Gal et al., 2007).

595 Using chemical inhibitors and mutants, we demonstrated that biomineralization by  
596 *P. aeruginosa* was necessary for lung deterioration, and that preventing it could  
597 rescue the infected tissue. The fact the free-living bacteria do not seem to be  
598 affected by inhibiting biomineralization, and remain in the culture, while the tissue  
599 itself is rescued, highlights the importance of host attachment during infection. It is  
600 also possible that the restrictive properties of crystalline minerals on the diffusivity  
601 and viscoelasticity could be deleterious to the host tissue. Moreover, consistent  
602 with the protective role of the mineral for the bacterial biofilm, chemical or genetic

603 inhibition of mineralization restored the sensitivity the *P. aeruginosa* to antibiotic  
604 treatment (Fig. 5 and Fig. 6).

605 Our work suggests that it is time to reconsider the old definition of bacterial  
606 mineralization solely as a passive, unintended byproduct of environmental  
607 bacterial activity. Instead, here we provide evidence that it can also be a regulated  
608 developmental process originating from a dedicated, previously uncharacterized  
609 microbial compartment, conferring clear benefits to biofilm-residing bacteria.  
610 Biomineralization is highly conserved, and thus is of enormous clinical significance,  
611 as it can yield completely novel classes of broad-spectrum drugs to combat  
612 emerging biofilm infections.

613

## 614 **Methods**

### 615 **Strains and media**

616 All strains used in this work were either wild type or derivatives from *Bacillus*  
617 *subtilis* NCIB 3610, *Pseudomonas aeruginosa* PA14, PA01 and *Mycobacterium*  
618 *abscessus* ATCC 19977 (recently renamed *Mycobacteroides abscessus*). A list of  
619 strains used in this study can be found in Supplementary Table 1. Deletions of  
620 *arsR*, *mntR*, *zur*, *cueR*, *copA* and *chaA* were generated by transforming *B. subtilis*  
621 NCIB 3610 with genomic DNA isolated from *B. subtilis* 168 deletion library {Koo,  
622 2017 #6} (Addgene, Cat#1000000115), and verified by PCR. Deletion of *yetJ* and  
623 *yloB* was done as previously described, and double and triple mutants were  
624 generated by transformation with genomic DNA, and verified by PCR. *P.*  
625 *aureginosa* PA01 single *psCA1* (CA1), double *psCA1-psCA2* (CA1-2), and triple  
626 *psCA1-psCA2-psCA3* (CA1-2-3) mutants were reported earlier (Lotlikar et al.,  
627 2019). Deletion of *caIC* was generated as described in (Hoang et al., 2000).

628

### 629 **Biofilm assays**

630 *B. subtilis* and *M. abscessus* biofilms were grown on B4 biofilm-promoting solid  
631 medium (0.4% yeast extract, 0.5% glucose, and 1.5% agar) (Barabesi et al., 2007)

632 supplemented with calcium acetate at 0.25% v/v, incubated at 30°C and 37°C  
633 respectively, in a sealed box for enriched CO<sub>2</sub> environment achieved by using the  
634 candle jar method (Oppenheimer-Shaanan et al., 2016). *P. aeruginosa* biofilms  
635 were grown on TB medium, as described previously (Dietrich et al., 2013) or on  
636 Brain Heart Infusion Broth (BHI, Sigma-Aldrich) supplemented with 1% agar.  
637 SCFM medium was prepared as in (Palmer et al., 2005) and supplemented with  
638 1.5% agar. Crystal-violet biofilm assay was carried out as previously described  
639 (O'Toole, 2011).

640 When indicated, the medium was supplemented with the following inhibitors  
641 purchased from Sigma-Aldrich: acetohydroxamic acid (AHA) (Cat. #159034); 5,5'-  
642 Dithiobis(2-nitrobenzoic acid) (DTNB) (Cat. #D8130); acetazolamide (Diamox)  
643 (Cat. #A6011) and sodium metavanadate (SMV) (Cat. #590088). The  
644 concentrations used are indicated in the text.

645

#### 646 **Phase microscopy**

647 Biofilm colonies were observed using a Nikon D3 camera or a Stereo Discovery  
648 V20" microscope (Tochigi, Japan) with objectives Plan Apo S × 0.5 FWD 134 mm  
649 or Apo S × 1.0 FWD 60 mm (Zeiss, Goettingen, Germany) attached to AxioCam  
650 camera, as required. Data were captured using Axiovision suite software (Zeiss).

651

#### 652 **Planktonic growth assays**

653 All strains were grown from a single colony isolated over lysogeny broth (LB) plates  
654 to a mid-logarithmic phase of growth (4 h at 37°C with shaking). Cells were diluted  
655 1:100 in 150 µl liquid B4 medium in 96-well microplate (Thermo Scientific). Cells  
656 were grown at 30°C for 20 h in a microplate reader (Synergy 2, BioTek), and the  
657 optical density at 600 nm (OD<sub>600</sub>) was measured every 15 min. Three independent  
658 experiments were conducted, with three technical repeats per plate.

659 CFU assay was carried out as previously described in detail (Bucher et al., 2016).

660

## 661 **RNA extraction and library preparation**

662 Biofilm colonies were grown on biofilm-promoting B4 solid medium with and  
663 without calcium for 1, 2, 3 and 6 days. Three independent experiments were  
664 conducted, with three colonies from each treatment combined for RNA extraction  
665 in each experiment. The samples were frozen in liquid nitrogen and stored until  
666 extraction. Frozen bacterial pellets were lysed using the Fastprep homogenizer  
667 (MP Biomedicals) and RNA was extracted with the FastRNA PROT blue kit (MP  
668 Biomedicals, 116025050) according to the manufacturer's instructions. RNA levels  
669 and integrity were determined by Qubit RNA BR Assay Kit (Life Technologies,  
670 Q10210) and TapeStation, respectively. All RNA samples were treated with  
671 TURBO DNase (Life Technologies, AM2238).

672 A total of 5 ug RNA from each sample was subjected to rRNA depletion using the  
673 Illumina Ribo-Zero rRNA Removal Kit (Bacteria, MRZB12424), according to the  
674 manufacturers' protocols. RNA quantity and quality post-depletion was assessed  
675 as above. RNA-seq libraries were contracted with NEBNext® Ultra™ Directional  
676 RNA Library Prep Kit (NEB, E7420) according to the manufacturer's instructions.  
677 Libraries concentrations and sizes were evaluated as above, and were sequenced  
678 as multiplex indexes in one lane using the Illumina HighSeq2500 platform.

679

## 680 **RNAseq processing**

681 Reads were trimmed from their adapter with cutadapt and aligned to the *B. subtilis*  
682 genome (subsp. *subtilis* str. NCIB 3610, NZ\_CM000488.1) with Bowtie2 version  
683 2.3.4.1 (Langmead and Salzberg, 2012). The number of uniquely mapped reads  
684 per gene was calculated with HT-seq (Anders et al., 2015). Normalization and  
685 testing for differential expression was performed with DESeq2 v1.16. A gene was  
686 considered to be differentially expressed using the following criteria: normalized  
687 mean read count  $\geq 30$ , fold change  $\geq 3$ , and adjusted p value  $< 0.05$ . First, we  
688 tested for differential expression between samples grown with and without calcium  
689 separately for each time point; however, since the results for days 1, 2 and 3 were  
690 very similar, we joined days 1-3. The crude read count, normalized read count,

691 and the result of the differentially expression tests are available in Supplementary  
692 File 1.

693

#### 694 **Comparison between growth conditions**

695 We compared our RNAseq expression data to publically available transcriptomes  
696 representing 269 different growth conditions (Nicolas et al., 2012). Because that  
697 study used microarray platform and not RNAseq, the comparison was performed  
698 using the top 10% genes with the highest expression level of every condition and  
699 every replicate (383 genes per sample). We than used Jaccard index to measure  
700 the overlap between the conditions of the two platforms (i.e. the current study and  
701 (Nicolas et al., 2012)). Prior to the analysis, we removed 152 genes that appear  
702 among the top 10% in more than 80% of the conditions.

703

#### 704 **Scanning electron microscopy and EDX**

705 Biofilm colonies were grown for 1, 3, 6, 10 and 15 days at 30°C on biofilm-  
706 promoting B4 solid medium, with or without calcium. The colonies were fixed  
707 overnight at 4°C with 2% glutaraldehyde, 3% paraformaldehyde, 0.1 M sodium  
708 cacodylate (pH 7.4) and 5 mM CaCl<sub>2</sub>, dehydrated and dried as in (Bucher et al.,  
709 2016; Bucher et al., 2015b). Clinical samples were first partially or completely  
710 bleached to remove the organic material by 1 hour of incubation in either 3% or  
711 6% sodium hypochlorite, respectively. The insoluble material was collected,  
712 washed three times in PBS, three times in acetone and air-dried for 16 hours.

713 Mounted samples were coated with 15 nm thick carbon layer in carbon coater  
714 (EDWARDS). The imaging by secondary electron (SE) or back scattered electron  
715 (BSE) detectors and the Energy Dispersive X-ray Spectroscopy (EDS, Bruker)  
716 were performed using Carl Zeiss Ultra 55 or Supra scanning electron microscopes.

717

#### 718 **Cryo-STEM analysis**



719 Bacterial colonies grown as described were suspended in PBS buffer. Quantifoil  
720 TEM grids were glow-discharged with an Evacron Combi-Clean glow-discharge  
721 device, and 5 microliters of suspended cells were deposited onto the glow-  
722 discharged grids. Ten nm-diameter gold fiducials (Duchesne et al., 2008) were  
723 applied before blotting and verification using a Leica EM-GP automated plunging  
724 device (Leica). No chemical fixation was used to avoid artifacts

725 Vitrified samples were observed with a Tecnai F20 S/TEM instrument (Thermo  
726 Fisher Scientific) at 200 kV, with Gatan 805 brightfield and Fischione HAADF  
727 detectors. Microscope conditions: extraction voltage = 4300 V, gun lens = 3 or 6,  
728 and spot size = 5 or 6 with 10 micrometer condenser apertures, yielding probe  
729 diameters of 1-2 nm and semi-convergence angles of ~ 1.3- 2.7 mrad. Images of  
730 2048 X 2048 pixels were recorded with probe dwell times of 8-18 microseconds.  
731 Spatial sampling was set between 1 and 4 nm/pixel. Electron doses were 1–3  
732 electrons/A<sup>2</sup> per image. Single-axis tilt series were recorded using SerialEM  
733 (Kremer et al., 1996). EDX was performed in STEM mode on vitrified cell samples  
734 with the same electron microscope set-up as used for STEM imaging, using a  
735 liquid N<sub>2</sub> cooled Si(Li) detector (EDAX). Vitrified grids contacting 100-200 cells per  
736 grid were automatically imaged on a Talos Arctica (Thermo Fisher Scientific)  
737 microscope in STEM mode, and mapped at intermediate magnifications (10-13k)  
738 using SerialEM software to obtain large fields of view for quantification of data  
739 presented in Fig. 2C. The quantification was done by manually counting the cells  
740 with or without dense deposits.

741

## 742 **Tomography reconstructions and visualization**

743 The CSTET tomographic tilt series were aligned using fiducial markers and  
744 reconstructed using weighted back projection (Frangakis and Hegerl, 2001) as  
745 implemented in the IMOD software suite (Kremer et al., 1996). Reconstructions  
746 are displayed after non-linear anisotropic diffusion filtering within IMOD.  
747 Segmentation and volume rendering were performed using Amira 6.3 (FEI  
748 Visualization Sciences Group).

## 749 **STED image acquisition**

750 Cells were isolated from 3-6 day old biofilm colonies and stained with Calcein-AM  
751 (20  $\mu$ M) and NileRed (100  $\mu$ g/ml). Immediately after the staining procedure, the  
752 cells were mounted on a coverslip and immobilized by an agarose pad (1%  
753 agarose, S7<sub>50</sub> minimal media). STED microscopy was performed using a Leica  
754 SP8 confocal microscope with a 100x oil immersion objective (NA: 1.4). A 552 nm  
755 laser line was used for confocal detection of NileRed, a 494 nm excitation laser  
756 and a 592 nm depletion laser were used for G-STED detection of Calcein-AM.  
757 Channels were acquired with 200 Hz (4 x line averaging) and the appropriately set  
758 HyD hybrid detectors. Images processing was performed using Leica LAS X and  
759 the deconvolution of the respective channels was performed using the Huygens  
760 algorithm.

761

## 762 **Micro-CT X-ray analysis**

763 Images of indicated magnification were taken using a Zeiss micro XCT 400  
764 instrument (Pleasanton, CA, USA). Tomography was carried out using a micro-  
765 focused source set at 20 kV and 100  $\mu$ A. 1200 separate 2D images were taken  
766 with a pixel size of 0.87 mm over 1800, exposure time of 30 sec. Image analysis  
767 was carried out with Avizo software (VSG, Hillsboro, OR, USA).

768

## 769 **FTIR spectrophotometer analysis**

770 Calcite was collected as described by Mahamid *et al.*, with some modifications  
771 (Mahamid *et al.*, 2008): agar samples were slightly bleached with 6% sodium  
772 hypochlorite for 1 min to remove organic matter, washed with Milli-Q water twice  
773 and dehydrated in acetone.

774 FTIR spectra of the bleached samples were acquired in KBr pellets by using a  
775 NICOLET iS5 spectrometer (Thermo Scientific, Pittsburgh, PA, USA). The  
776 samples were homogenized in an agate mortar and pestle with about 40 mg of

777 KBr, and pressed into a 7 mm pellet using a manual hydraulic press (Specac,  
778 Orpington, UK). Infrared spectra were obtained at 4 cm<sup>-1</sup> resolution for 32 scans.

779 The infrared calcite spectrum has three characteristic peaks, designated  $\nu_2$ ,  $\nu_3$ ,  
780 and  $\nu_4$ . Calcium carbonate  $\nu_3$  peak is expected at 1425 cm<sup>-1</sup> for calcite, 1490 cm<sup>-1</sup>  
781 for vaterite and 1475 cm<sup>-1</sup> for aragonite. The calcium carbonate  $\nu_2$  peak is  
782 expected at 875 cm<sup>-1</sup> for calcite, 850 cm<sup>-1</sup> for vaterite and 855 cm<sup>-1</sup> for aragonite.  
783 Finally, the calcium carbonate  $\nu_4$  peak is expected at 713 cm<sup>-1</sup> for calcite, 750 cm<sup>-1</sup>  
784 <sup>1</sup> for vaterite and 715 cm<sup>-1</sup> for aragonite (Politi et al., 2004).

785

### 786 **Patient's samples**

787 Sputum was collected from adult patients as published previously (Schiller and  
788 Millard, 1983) and stored in 4°C degrees. All patients positive for calcite were  
789 carrying chronic *pseudomonas* infections. Specific patient information can be  
790 found in Supplementary Table 2. The samples were collected under Helsinki  
791 approval to Prof. Eitan Keren 0456-17-HMO. For FTIR analysis, organic matter  
792 was removed as described above.

793

### 794 **Ex vivo lung infection system**

795 Animal work was carried out under ethical approval MD-16-15035-1. Lungs were  
796 harvested from 2 mice (one month old) and placed in petri dishes containing  
797 DMEM 5% FCS. We divided the tissue into circular pieces 3 mm in diameter with  
798 a biopsy punch and transferred to a 24 well plate (4-5 explants/well) with 450  $\mu$ l  
799 DMEM. DMEM was applied with carbenicillin 100  $\mu$ g/ml (Sigma-Aldrich) and  
800 chemical inhibitors, as indicated. To each respective well, either 50  $\mu$ l DMEM  
801 (control) or *P. aeruginosa* (pretreated with chemical inhibitors when indicated and  
802 diluted within DMEM to attain OD<sub>600</sub> 0.4) was added – with three technical repeats  
803 for each condition. The plates were incubated at 37°C for ~2 days (52 hours),  
804 washed twice with PBS, fixed with PFA 4% for 10 minutes, and imbedded in either  
805 cryosection (OCT) compound or paraffin. Paraffin samples were cut into 7 micron

806 slices and stained with H&E; whereas cryosections were cut into 10 micron slices  
807 and placed on superfrost plus slides.

808

### 809 **Cultivable Cell Quantification (CFU)**

810 CFU quantification was done as previously described (Bucher et al., 2015a). For  
811 CFU of bacteria infecting *ex vivo* tissue culture: individual punches or their growth  
812 media were collected, Punches were resuspended in 1 ml PBS (Biological  
813 Industries), and free-living bacteria were pelleted and resuspended in PBS at the  
814 same volume. Samples were thoroughly vortexed (5 min). The samples were then  
815 mildly sonicated (BRANSON digital sonifier, Model 250, Microtip, amplitude 30%,  
816 pulse  $2 \times 5$  s). In all cases, to determine the number of viable cells, samples were  
817 serially diluted in PBS, plated on LB plates, and colonies were counted after  
818 incubation at 30°C overnight. For

819

### 820 **Acknowledgments**

821 The Kolodkin-Gal lab is supported by the Israel Science Foundation grant number  
822 119/16, Israel Foundation grant number JSPS 184.20 , Kamin grant by Israel Chief  
823 Scientist no. 67459, Israel Ministry of Science, Technology & Space (grant no.  
824 713454), Ministry of Health (grant no. 713645) , Angel-Fiavovich fund for  
825 ecological research, Dr. Barry Sherman Institute for Medicinal Chemistry, Kekst  
826 Family Institute for Medical Genetics and by the Helen and Milton A. Kimmelman  
827 Center for Biomolecular Structure & Assembly. IKG is a recipient of Rowland and  
828 Sylvia Career Development Chair. The electron microscopy studies were partially  
829 supported by the Irving and Cherna Moskowitz Center for Nano and BioNano  
830 Imaging (Weizmann Institute of Science). We thank Prof. Ehud Banin and to Itzhak  
831 Zander (Bar-Ilan University) for helpful discussions, and for providing PA01 strains.

832

833

834

## 835 References

- 836 Anders, S., Pyl, P.T., and Huber, W. (2015). HTSeq-a Python framework to work with  
837 high-throughput sequencing data. *Bioinformatics* 31, 166-169.
- 838 Asally, M., Kittisopikul, M., Rue, P., Du, Y., Hu, Z., Cagatay, T., Robinson, A.B., Lu, H.,  
839 Garcia-Ojalvo, J., and Suel, G.M. (2012). Localized cell death focuses mechanical forces  
840 during 3D patterning in a biofilm. *Proc Natl Acad Sci U S A* 109, 18891-18896.
- 841 Barabesi, C., Galizzi, A., Mastromei, G., Rossi, M., Tamburini, E., and Perito, B. (2007).  
842 *Bacillus subtilis* gene cluster involved in calcium carbonate biomineralization. *J Bacteriol*  
843 189, 228-235.
- 844 Blondeau, M., Sachse, M., Boulogne, C., Gillet, C., Guigner, J.M., Skouri-Panet, F.,  
845 Poinot, M., Ferard, C., Miot, J., and Benzerara, K. (2018). Amorphous Calcium Carbonate  
846 Granules Form Within an Intracellular Compartment in Calcifying Cyanobacteria.  
847 *Frontiers in Microbiology* 9.
- 848 Bloom-Ackermann, Z., Steinberg, N., Rosenberg, G., Oppenheimer-Shaanan, Y., Pollack,  
849 D., Ely, S., Storzi, N., Levy, A., and Kolodkin-Gal, I. (2016). Toxin-Antitoxin systems  
850 eliminate defective cells and preserve symmetry in *Bacillus subtilis* biofilms. *Environ*  
851 *Microbiol* 18, 5032-5047.
- 852 Branda, S.S., Vik, S., Friedman, L., and Kolter, R. (2005). Biofilms: the matrix revisited.  
853 *Trends Microbiol* 13, 20-26.
- 854 Broomfield, R.J., Morgan, S.D., Khan, A., and Stickler, D.J. (2009). Crystalline bacterial  
855 biofilm formation on urinary catheters by urease-producing urinary tract pathogens: a  
856 simple method of control. *J Med Microbiol* 58, 1367-1375.
- 857 Bryers, J.D. (2008). Medical biofilms. *Biotechnol Bioeng* 100, 1-18.
- 858 Bucher, T., Kartvelishvily, E., and Kolodkin-Gal, I. (2016). Methodologies for Studying  
859 *B. subtilis* Biofilms as a Model for Characterizing Small Molecule Biofilm Inhibitors. *J*  
860 *Vis Exp*.
- 861 Bucher, T., Keren-Paz, A., Hausser, J., Olender, T., Cytryn, E., and Kolodkin-Gal, I.  
862 (2019). An active beta-lactamase is a part of an orchestrated cell wall stress resistance  
863 network of *Bacillus subtilis* and related rhizosphere species. *Environ Microbiol*.
- 864 Bucher, T., Oppenheimer-Shaanan, Y., Savidor, A., Bloom-Ackermann, Z., and Kolodkin-  
865 Gal, I. (2015a). Disturbance of the bacterial cell wall specifically interferes with biofilm  
866 formation. *Environ Microbiol Rep* 7, 990-1004.
- 867 Bucher, T., Oppenheimer-Shaanan, Y., Savidor, A., Bloom-Ackermann, Z., and Kolodkin-  
868 Gal, I. (2015b). Disturbance of the bacterial cell wall specifically interferes with biofilm  
869 formation. *Environmental microbiology reports*.
- 870 Caimmi, D., Martocq, N., Trioleyre, D., Guinet, C., Godreuil, S., Daniel, T., and Chiron,  
871 R. (2018). Positive Effect of Liposomal Amikacin for Inhalation on *Mycobacterium*  
872 *abcessus* in Cystic Fibrosis Patients. *Open Forum Infect Dis* 5, ofy034.
- 873 Chang, Y., Bruni, R., Kloss, B., Assur, Z., Kloppmann, E., Rost, B., Hendrickson, W.A.,  
874 and Liu, Q. (2014). Structural basis for a pH-sensitive calcium leak across membranes.  
875 *Science* 344, 1131-1135.
- 876 Clausen, J.D., Bublitz, M., Arnou, B., Olesen, C., Andersen, J.P., Moller, J.V., and Nissen,  
877 P. (2016). Crystal Structure of the Vanadate-Inhibited Ca<sup>2+</sup>-ATPase. *Structure* 24, 617-  
878 623.
- 879 Cohen-Cymberknoh, M., Gilead, N., Gartner, S., Rovira, S., Blau, H., Mussaffi, H., Rivlin,  
880 J., Gur, M., Shteinberg, M., Bentur, L., *et al.* (2016). Eradication failure of newly acquired

881 *Pseudomonas aeruginosa* isolates in cystic fibrosis. *Journal of cystic fibrosis : official*  
882 *journal of the European Cystic Fibrosis Society.*

883 Colvin, K.M., Gordon, V.D., Murakami, K., Borlee, B.R., Wozniak, D.J., Wong, G.C., and  
884 Parsek, M.R. (2011). The pel polysaccharide can serve a structural and protective role in  
885 the biofilm matrix of *Pseudomonas aeruginosa*. *PLoS Pathog* 7, e1001264.

886 Colvin, K.M., Irie, Y., Tart, C.S., Urbano, R., Whitney, J.C., Ryder, C., Howell, P.L.,  
887 Wozniak, D.J., and Parsek, M.R. (2012). The Pel and Psl polysaccharides provide  
888 *Pseudomonas aeruginosa* structural redundancy within the biofilm matrix. *Environ*  
889 *Microbiol* 14, 1913-1928.

890 Costerton, J.W., Stewart, P.S., and Greenberg, E.P. (1999). Bacterial biofilms: a common  
891 cause of persistent infections. *Science* 284, 1318-1322.

892 de Hoon, M.J., Eichenberger, P., and Vitkup, D. (2010). Hierarchical evolution of the  
893 bacterial sporulation network. *Curr Biol* 20, R735-745.

894 Dhami, N.K., Reddy, M.S., and Mukherjee, A. (2013). Biomineralization of calcium  
895 carbonate polymorphs by the bacterial strains isolated from calcareous sites. *J Microbiol*  
896 *Biotechnol* 23, 707-714.

897 Dietrich, L.E., Okegbe, C., Price-Whelan, A., Sakhtah, H., Hunter, R.C., and Newman,  
898 D.K. (2013). Bacterial community morphogenesis is intimately linked to the intracellular  
899 redox state. *J Bacteriol* 195, 1371-1380.

900 Dietrich, L.E., Teal, T.K., Price-Whelan, A., and Newman, D.K. (2008). Redox-active  
901 antibiotics control gene expression and community behavior in divergent bacteria. *Science*  
902 321, 1203-1206.

903 Douglas, S., and Beveridge, T.J. (1998). Mineral formation by bacteria in natural microbial  
904 communities. *Fems Microbiology Ecology* 26, 79-88.

905 Dragos, A., and Kovacs, A.T. (2017). The Peculiar Functions of the Bacterial Extracellular  
906 Matrix. *Trends Microbiol* 25, 257-266.

907 Duchesne, L., Gentili, D., Comes-Franchini, M., and Fernig, D.G. (2008). Robust ligand  
908 shells for biological applications of gold nanoparticles. *Langmuir* 24, 13572-13580.

909 El Mammeri, N., Hierrezuelo, J., Tolchard, J., Camara-Almiron, J., Caro-Astorga, J.,  
910 Alvarez-Mena, A., Dutour, A., Berbon, M., Shenoy, J., Morvan, E., *et al.* (2019).  
911 Molecular architecture of bacterial amyloids in *Bacillus* biofilms. *FASEB J*,  
912 fj201900831R.

913 Flemming, H.C., and Wuertz, S. (2019). Bacteria and archaea on Earth and their abundance  
914 in biofilms. *Nature Reviews Microbiology* 17, 247-260.

915 Frangakis, A.S., and Hegerl, R. (2001). Noise reduction in electron tomographic  
916 reconstructions using nonlinear anisotropic diffusion. *Journal of structural biology* 135,  
917 239-250.

918 Frankel, R.B., and Bazylinski, D.A. (2003). Biologically induced mineralization by  
919 bacteria. *Rev Mineral Geochem* 54, 95-114.

920 Fujisawa, M., Wada, Y., Tsuchiya, T., and Ito, M. (2009). Characterization of *Bacillus*  
921 *subtilis* YfkE (ChaA): a calcium-specific Ca<sup>2+</sup>/H<sup>+</sup> antiporter of the CaCA family. *Arch*  
922 *Microbiol* 191, 649-657.

923 Gupta, H.K., Shrivastava, S., and Sharma, R. (2017). A Novel Calcium Uptake Transporter  
924 of Uncharacterized P-Type ATPase Family Supplies Calcium for Cell Surface Integrity in  
925 *Mycobacterium smegmatis*. *MBio* 8.

926 Guragain, M., Lenaburg, D.L., Moore, F.S., Reutlinger, I., and Patrauchan, M.A. (2013).  
927 Calcium homeostasis in *Pseudomonas aeruginosa* requires multiple transporters and  
928 modulates swarming motility. *Cell Calcium* *54*, 350-361.

929 Hale, L.V., Ma, Y.F., and Santerre, R.F. (2000). Semi-quantitative fluorescence analysis  
930 of calcein binding as a measurement of in vitro mineralization. *Calcified Tissue Int* *67*, 80-  
931 84.

932 Halloum, I., Carrere-Kremer, S., Blaise, M., Viljoen, A., Bernut, A., Le Moigne, V.,  
933 Vilcheze, C., Guerardel, Y., Lutfalla, G., Herrmann, J.L., *et al.* (2016). Deletion of a  
934 dehydratase important for intracellular growth and cording renders rough *Mycobacterium*  
935 *abscessus* avirulent. *Proc Natl Acad Sci U S A* *113*, E4228-4237.

936 Hassanov, T., Karunker, I., Steinberg, N., Erez, A., and Kolodkin-Gal, I. (2018). Novel  
937 antibiofilm chemotherapies target nitrogen from glutamate and glutamine. *Scientific*  
938 *reports* *8*, 7097.

939 Hewer, S.C.L., and Smyth, A.R. (2017). Antibiotic strategies for eradicating *Pseudomonas*  
940 *aeruginosa* in people with cystic fibrosis. *Cochrane Db Syst Rev*.

941 Hill, D., Rose, B., Pajkos, A., Robinson, M., Bye, P., Bell, S., Elkins, M., Thompson, B.,  
942 Macleod, C., Aaron, S.D., *et al.* (2005). Antibiotic susceptibilities of *Pseudomonas*  
943 *aeruginosa* isolates derived from patients with cystic fibrosis under aerobic, anaerobic, and  
944 biofilm conditions. *Journal of clinical microbiology* *43*, 5085-5090.

945 Hoang, T.T., Kutchma, A.J., Becher, A., and Schweizer, H.P. (2000). Integration-  
946 proficient plasmids for *Pseudomonas aeruginosa*: Site-specific integration and use for  
947 engineering of reporter and expression strains. *Plasmid* *43*, 59-72.

948 Hufnagel, D.A., Price, J.E., Stephenson, R.E., Kelley, J., Benoit, M.F., and Chapman, M.R.  
949 (2018). Thiol Starvation Induces Redox-Mediated Dysregulation of *Escherichia coli*  
950 Biofilm Components. *J Bacteriol* *200*.

951 Jansson, C., and Northen, T. (2010). Calcifying cyanobacteria--the potential of  
952 biomineralization for carbon capture and storage. *Curr Opin Biotechnol* *21*, 365-371.

953 Jo, J., Cortez, K.L., Cornell, W.C., Price-Whelan, A., and Dietrich, L.E. (2017). An orphan  
954 *cbb3*-type cytochrome oxidase subunit supports *Pseudomonas aeruginosa* biofilm growth  
955 and virulence. *Elife* *6*.

956 Jones, C.J., and Wozniak, D.J. (2017). Psl Produced by Mucoid *Pseudomonas aeruginosa*  
957 Contributes to the Establishment of Biofilms and Immune Evasion. *mBio* *8*.

958 Keren-Paz, A., Brumfeld, V., Oppenheimer-Shaanan, Y., and Kolodkin-Gal, I. (2018).  
959 Micro-CT X-ray imaging exposes structured diffusion barriers within biofilms. *NPJ*  
960 *Biofilms Microbiomes* *4*, 8.

961 Keren-Paz, A., and Kolodkin-Gal, I. (2020). A brick in the wall: Discovering a novel  
962 mineral component of the biofilm extracellular matrix. *N Biotechnol* *56*, 9-15.

963 Kobayashi, K., and Iwano, M. (2012). BslA(YuaB) forms a hydrophobic layer on the  
964 surface of *Bacillus subtilis* biofilms. *Molecular microbiology* *85*, 51-66.

965 Kolodkin-Gal, D., Zamir, G., Edden, Y., Pikarsky, E., Pikarsky, A., Haim, H., Haviv, Y.S.,  
966 and Panet, A. (2008). Herpes simplex virus type 1 preferentially targets human colon  
967 carcinoma: role of extracellular matrix. *Journal of virology* *82*, 999-1010.

968 Kolodkin-Gal, D., Zamir, G., Pikarski, E., Pikarski, A., Shimony, N., Wu, H., Haviv, Y.S.,  
969 and Panet, A. (2007). A novel system to study adenovirus tropism to normal and malignant  
970 colon tissues. *Virology* *357*, 91-101.

- 971 Kolodkin-Gal, I., Elsholz, A.K., Muth, C., Girguis, P.R., Kolter, R., and Losick, R. (2013).  
972 Respiration control of multicellularity in *Bacillus subtilis* by a complex of the cytochrome  
973 chain with a membrane-embedded histidine kinase. *Genes Dev* 27, 887-899.
- 974 Kolter, R., and Greenberg, E.P. (2006). Microbial sciences: the superficial life of microbes.  
975 *Nature* 441, 300-302.
- 976 Komeili, A., Li, Z., Newman, D.K., and Jensen, G.J. (2006). Magnetosomes are cell  
977 membrane invaginations organized by the actin-like protein MamK. *Science* 311, 242-245.
- 978 Kremer, J.R., Mastrorade, D.N., and McIntosh, J.R. (1996). Computer visualization of  
979 three-dimensional image data using IMOD. *Journal of structural biology* 116, 71-76.
- 980 Kuhlbrandt, W. (2004). Biology, structure and mechanism of P-type ATPases. *Nat Rev*  
981 *Mol Cell Biol* 5, 282-295.
- 982 Langmead, B., and Salzberg, S.L. (2012). Fast gapped-read alignment with Bowtie 2. *Nat*  
983 *Methods* 9, 357-359.
- 984 Li, X., Chopp, D.L., Russin, W.A., Brannon, P.T., Parsek, M.R., and Packman, A.I. (2015).  
985 Spatial patterns of carbonate biomineralization in biofilms. *Appl Environ Microbiol* 81,  
986 7403-7410.
- 987 Li, X., Chopp, D.L., Russin, W.A., Brannon, P.T., Parsek, M.R., and Packman, A.I.  
988 (2016a). In Situ Biomineralization and Particle Deposition Distinctively Mediate Biofilm  
989 Susceptibility to Chlorine. *Appl Environ Microbiol* 82, 2886-2892.
- 990 Li, X., Lu, N., Brady, H.R., and Packman, A.I. (2016b). Biomineralization strongly  
991 modulates the formation of *Proteus mirabilis* and *Pseudomonas aeruginosa* dual-species  
992 biofilms. *FEMS Microbiol Ecol*.
- 993 Li, X., Lu, N., Brady, H.R., and Packman, A.I. (2016c). Ureolytic Biomineralization  
994 Reduces *Proteus mirabilis* Biofilm Susceptibility to Ciprofloxacin. *Antimicrob Agents*  
995 *Chemother* 60, 2993-3000.
- 996 Liu, J., Prindle, A., Humphries, J., Gabalda-Sagarra, M., Asally, M., Lee, D.Y., Ly, S.,  
997 Garcia-Ojalvo, J., and Suel, G.M. (2015). Metabolic co-dependence gives rise to collective  
998 oscillations within biofilms. *Nature* 523, 550-554.
- 999 Lotlikar, S.R., Kayastha, B.B., Vullo, D., Khanam, S.S., Braga, R.E., Murray, A.B.,  
1000 McKenna, R., Supuran, C.T., and Patrauchan, M.A. (2019). *Pseudomonas aeruginosa* beta-  
1001 carbonic anhydrase, psCA1, is required for calcium deposition and contributes to virulence.  
1002 *Cell Calcium* 84, 102080.
- 1003 Mahamid, J., Sharir, A., Addadi, L., and Weiner, S. (2008). Amorphous calcium phosphate  
1004 is a major component of the forming fin bones of zebrafish: Indications for an amorphous  
1005 precursor phase. *Proceedings of the National Academy of Sciences of the United States of*  
1006 *America* 105, 12748-12753.
- 1007 Massler, A., Kolodkin-Gal, D., Meir, K., Khalaileh, A., Falk, H., Izhar, U., Shufaro, Y.,  
1008 and Panet, A. (2011). Infant lungs are preferentially infected by adenovirus and herpes  
1009 simplex virus type 1 vectors: role of the tissue mesenchymal cells. *J Gene Med* 13, 101-  
1010 113.
- 1011 Mathur, S., Suller, M.T., Stickler, D.J., and Feneley, R.C. (2006). Factors affecting crystal  
1012 precipitation from urine in individuals with long-term urinary catheters colonized with  
1013 urease-positive bacterial species. *Urol Res* 34, 173-177.
- 1014 Monds, R.D., and O'Toole, G.A. (2009). The developmental model of microbial biofilms:  
1015 ten years of a paradigm up for review. *Trends in microbiology* 17, 73-87.



- 1016 Monteil, C.L., Benzerara, K., Menguy, N., Bidaud, C.C., Michot-Achdjian, E., Bolzoni,  
1017 R., Mathon, F.P., Coutaud, M., Alonso, B., Garau, C., *et al.* (2020). Intracellular  
1018 amorphous Ca-carbonate and magnetite biomineralization by a magnetotactic bacterium  
1019 affiliated to the Alphaproteobacteria. *ISME J.*
- 1020 Moore, C.M., and Helmann, J.D. (2005). Metal ion homeostasis in *Bacillus subtilis*. *Curr*  
1021 *Opin Microbiol* 8, 188-195.
- 1022 Morris, N.S., and Stickler, D.J. (1998). Encrustation of indwelling urethral catheters by  
1023 *Proteus mirabilis* biofilms growing in human urine. *J Hosp Infect* 39, 227-234.
- 1024 Nicolas, P., Mader, U., Dervyn, E., Rochat, T., Leduc, A., Pigeonneau, N., Bidnenko, E.,  
1025 Marchadier, E., Hoebeke, M., Aymerich, S., *et al.* (2012). Condition-dependent  
1026 transcriptome reveals high-level regulatory architecture in *Bacillus subtilis*. *Science* 335,  
1027 1103-1106.
- 1028 O'Toole, G.A. (2011). Microtiter dish biofilm formation assay. *J Vis Exp.*
- 1029 Oppenheimer-Shaanan, Y., Sibony-Nevo, O., Bloom-Ackermann, Z., Suissa, R.,  
1030 Steinberg, N., Kartvelishvily, E., Brumfeld, V., and Kolodkin-Gal, I. (2016). Spatio-  
1031 temporal assembly of functional mineral scaffolds within microbial biofilms. *NPJ Biofilms*  
1032 *Microbiomes* 2, 15031.
- 1033 Palmer, K.L., Mashburn, L.M., Singh, P.K., and Whiteley, M. (2005). Cystic fibrosis  
1034 sputum supports growth and cues key aspects of *Pseudomonas aeruginosa* physiology.  
1035 *Journal of Bacteriology* 187, 5267-5277.
- 1036 Phoenix, V.R., and Konhauser, K.O. (2008). Benefits of bacterial biomineralization.  
1037 *Geobiology* 6, 303-308.
- 1038 Politi, Y., Arad, T., Klein, E., Weiner, S., and Addadi, L. (2004). Sea urchin spine calcite  
1039 forms via a transient amorphous calcium carbonate phase. *Science* 306, 1161-1164.
- 1040 Reichhardt, C., and Parsek, M.R. (2019). Confocal Laser Scanning Microscopy for  
1041 Analysis of *Pseudomonas aeruginosa* Biofilm Architecture and Matrix Localization. *Front*  
1042 *Microbiol* 10, 677.
- 1043 Richards, J.P., Cai, W.L., Zill, N.A., Zhang, W.J., and Ojha, A.K. (2019). Adaptation of  
1044 *Mycobacterium tuberculosis* to Biofilm Growth Is Genetically Linked to Drug Tolerance.  
1045 *Antimicrob Agents Ch* 63.
- 1046 Romero, D., Aguilar, C., Losick, R., and Kolter, R. (2010). Amyloid fibers provide  
1047 structural integrity to *Bacillus subtilis* biofilms. *Proc Natl Acad Sci U S A* 107, 2230-2234.
- 1048 Schiller, N.L., and Millard, R.L. (1983). *Pseudomonas*-infected cystic fibrosis patient  
1049 sputum inhibits the bactericidal activity of normal human serum. *Pediatr Res* 17, 747-752.
- 1050 Semaniakou, A., Croll, R.P., and Chappe, V. (2018). Animal Models in the  
1051 Pathophysiology of Cystic Fibrosis. *Front Pharmacol* 9, 1475.
- 1052 Serra, D.O., and Hengge, R. (2014). Stress responses go three dimensional - the spatial  
1053 order of physiological differentiation in bacterial macrocolony biofilms. *Environ Microbiol*  
1054 16, 1455-1471.
- 1055 Serra, D.O., Richter, A.M., Klauck, G., Mika, F., and Hengge, R. (2013). Microanatomy  
1056 at cellular resolution and spatial order of physiological differentiation in a bacterial biofilm.  
1057 *MBio* 4, e00103-00113.
- 1058 Steinberg, N., Keren-Paz, A., Hou, Q., Doron, S., Yanuka-Golub, K., Olender, T., Hadar,  
1059 R., Rosenberg, G., Jain, R., Camara-Almiron, J., *et al.* (2020). The extracellular matrix  
1060 protein TasA is a developmental cue that maintains a motile subpopulation within *Bacillus*  
1061 *subtilis* biofilms. *Sci Signal* 13.

1062 Steinberg, N., and Kolodkin-Gal, I. (2015). The Matrix Reloaded: Probing the Extracellular  
1063 Matrix Synchronizes Bacterial Communities. *J Bacteriol*.  
1064 Stewart, P.S., and Franklin, M.J. (2008). Physiological heterogeneity in biofilms. *Nat Rev*  
1065 *Microbiol* *6*, 199-210.  
1066 Tan, Y., Leonhard, M., Moser, D., Ma, S., and Schneider-Stickler, B. (2018). Inhibitory  
1067 effect of probiotic lactobacilli supernatants on single and mixed non-albicans *Candida*  
1068 species biofilm. *Arch Oral Biol* *85*, 40-45.  
1069 Veening, J.W., Kuipers, O.P., Brul, S., Hellingwerf, K.J., and Kort, R. (2006). Effects of  
1070 phosphorelay perturbations on architecture, sporulation, and spore resistance in biofilms of  
1071 *Bacillus subtilis*. *J Bacteriol* *188*, 3099-3109.  
1072 Vlamakis, H., Aguilar, C., Losick, R., and Kolter, R. (2008). Control of cell fate by the  
1073 formation of an architecturally complex bacterial community. *Genes Dev* *22*, 945-953.  
1074 Vlamakis, H., Chai, Y., Beaugregard, P., Losick, R., and Kolter, R. (2013). Sticking  
1075 together: building a biofilm the *Bacillus subtilis* way. *Nature reviews Microbiology* *11*,  
1076 157-168.  
1077 Weiner, S., and Dove, P.M. (2003). An overview of biomineralization processes and the  
1078 problem of the vital effect. *Rev Mineral Geochem* *54*, 1-29.  
1079 Wermser, C., and Lopez, D. (2018). Identification of *Staphylococcus aureus* genes  
1080 involved in the formation of structured macrocolonies. *Microbiology (Reading)* *164*, 801-  
1081 815.  
1082 Wilking, J.N., Zaburdaev, V., De Volder, M., Losick, R., Brenner, M.P., and Weitz, D.A.  
1083 (2013). Liquid transport facilitated by channels in *Bacillus subtilis* biofilms. *Proc Natl*  
1084 *Acad Sci U S A* *110*, 848-852.  
1085 Wolf, S.G., Houben, L., and Elbaum, M. (2014). Cryo-scanning transmission electron  
1086 tomography of vitrified cells. *Nat Methods* *11*, 423-428.  
1087 Wu, B.C., Haney, E.F., Akhoundsadegh, N., Pletzer, D., Trimble, M.J., Adriaans, A.E.,  
1088 Nibbering, P.H., and Hancock, R.E.W. (2021). Human organoid biofilm model for  
1089 assessing antibiofilm activity of novel agents. *NPJ Biofilms Microbiomes* *7*, 8.  
1090 Yoon, S.S., and Hassett, D.J. (2004). Chronic *Pseudomonas aeruginosa* infection in cystic  
1091 fibrosis airway disease: metabolic changes that unravel novel drug targets. *Expert Rev Anti*  
1092 *Infect Ther* *2*, 611-623.  
  
1093  
  
1094  
  
1095  
  
1096  
  
1097  
  
1098  
  
1099  
  
1100

1101 **Figure Legends:**

1102 **Figure 1: Calcium is necessary for normal biofilm development and structure**

1103 A. Light microscopy images of 6-day-old *B. subtilis* NCIB 3610 biofilm colonies  
1104 grown on B4 agar, showing the effect of addition of calcium (0.25% v/v calcium  
1105 acetate) on colony architecture. Scale bar – 2 mm. A representative image (out  
1106 of n = 3 experiments) is shown.

1107 B. Volcano-plot depicting calcium-dependent changes in the transcriptome in *B.*  
1108 *subtilis* biofilm colonies. Significance (P values) vs difference (fold changes)  
1109 are plotted. Functional categories were determined by DAVID analysis.

1110 C. A heatmap with all differentially expressed genes (n = 876), scaled to the mean  
1111 expression level of each gene. The map is ordered by age of biofilm colonies,  
1112 as shown by the left colored bar, where green are genes that are differentially  
1113 expressed in days 1-3, and day 6; purple genes that are differentially expressed  
1114 in days 1-3 and yellow genes that are differentially expressed in day 6.

1115 D. The top 20 conditions (Nicolas et al., 2012), showing the highest similarity  
1116 (expressed as Jaccard index) to the transcriptome of *B. subtilis* 6-day-old  
1117 biofilm colonies grown with or without calcium.

1118 E. Biofilm cells closely associated with prismatic mineral structures, as visualized  
1119 by Scanning Electron Microscopy (SEM) image of 10-day-old *B. subtilis* biofilm  
1120 colony grown with calcium. Upper panel - secondary mode; lower panel -  
1121 backscattering mode. Magnification – X25000, scale bar – 1  $\mu$ m. A  
1122 representative field (out of n=5 fields, from 6 experiments) is shown.

1123 F. EDX analysis of areas indicated in (E), indicating that mineral structures are  
1124 rich in calcium. Ca – calcium-rich, Cnt – control.

1125 G. 3D re-construction of microCT X-Ray analysis revealing 3D mineral distribution  
1126 in a 5-day old *B. subtilis* colony grown with calcium. Color indicates intensity,  
1127 with green representing the densest mineral. Scale bar – 0.2 mm. A  
1128 representative image (out of n = 3 experiments) is shown.

1129 H. Light microscopy images of 5-day-old *B. subtilis* biofilm colonies grown with  
1130 calcium, and supplemented with calcium uptake inhibitor (0.1 mg/ml sodium  
1131 metavanadate (SMV)), as indicated. NT indicated untreated culture. Scale bar  
1132 – 2 mm. A representative image (out of n = 3 experiments) is shown.

1133 I. The effect of inhibiting calcium uptake on planktonic growth. *B. subtilis* was  
1134 grown shaking in liquid LB medium with calcium, supplemented with 0.1 mg/ml  
1135 SMV, as indicated. Results are averages of nine wells, bars represent standard  
1136 deviations. A representative experiment (out of n=3 experiments) is shown.

1137

## 1138 **Figure 2: Mineralization is initiated intracellularly**

1139 A. A 30-nm thick virtual slice through a CSTET 3D reconstruction of *B. subtilis*  
1140 cells showing intracellular calcium-rich deposits (arrows). Scale bar – 400 nm.  
1141 A representative field (out of n=20 fields, from 3 experiments) is shown.

1142 B. Volume rendering (orange) and a single orthoslice (greyscale) through the  
1143 center of the volume, from a 3D CSTET reconstruction. The calcium-rich  
1144 deposits are artificially colored (blue).

1145 C. Quantification of different subpopulations within a 6-day old *B. subtilis* biofilm  
1146 colony, showing enrichment of cells with mineral foci in the structured areas  
1147 (wrinkles) of the colony.

1148 D. Intracellular calcium levels of bacterial cells (n=150) stained with calcein-AM, a  
1149 calcium-specific fluorescent dye. Cells were isolated from *B. subtilis* biofilm  
1150 colonies (day 3 and 6) grown with calcium. Inset – a representative image of  
1151 stained cells isolated from a 6 day-old biofilm. Green – calcein-AM, red –  
1152 NileRed membrane stain, gray – DIC. Scale bar – 2  $\mu$ m.

1153 E. and F. G-STED images *B. subtilis* cells isolated from 6 day-old biofilm colonies  
1154 grown with calcium. Green – calcein-AM, red – NileRed membrane stain, gray  
1155 – DIC. Scale bar – 2  $\mu$ m.

1156 G. 30-nm thick virtual slice through a CSTET 3D reconstruction. Arrows indicate  
1157 calcium-rich deposits associated with a membrane from the outside of the cell.  
1158 Scale bar – 400 nm.

1159 H. Light microscopy images of 3-day-old biofilm colonies of wild-type *B. subtilis*  
1160 and its mutant derivatives (see text for details) grown with calcium. Scale bar –  
1161 2 mm. A representative experiment (out of n=3 experiments) is shown.

1162 I. Volcano-plot depicting CueR-dependent changes in expression of genes in 3-  
1163 day old *B. subtilis* biofilm colony. Significance (P values) vs difference (fold  
1164 changes) are plotted. Functional categories were determined by DAVID  
1165 analysis.

1166 J. Light microscopy images of 2-day-old biofilm colonies of wild-type *B. subtilis*  
1167 and its mutant derivatives (see text for details) grown with calcium. Scale bar –  
1168 2 mm. A representative experiment (out of n=3 experiments) is shown.

1169

1170 **Figure 3: The role of calcium in the biofilm structure is conserved across**  
1171 **bacterial species**

1172 A. Light microscopy (left) and microCT-X-ray (right) images of 3-day-old *P.*  
1173 *aeruginosa* PA14 biofilm colonies grown on TB agar. In the X-Ray images, the  
1174 bright contrast appears white, and indicates the location of dense mineral, while  
1175 the organic matter appears dark. Scale bar – 1 mm. A representative image  
1176 (out of n = 3 experiments) is shown.

1177 B. Light microscopy images of 3-day-old *P. aeruginosa* PA14 of biofilm colonies  
1178 grown on TB agar supplemented with 1 mg/ml EDTA (chelating agent), either  
1179 with or without the addition of 700 mM CaCl<sub>2</sub>. Scale bar – 1 mm. A  
1180 representative experiment (out of n=3 experiments) is shown.

1181 C. Light microscopy images of 3-day-old *P. aeruginosa* PA14 biofilm colonies,  
1182 grown on TB agar either untreated (NT), or supplemented with 700 mM CaCl<sub>2</sub>  
1183 and EGTA (calcium chelator), as indicated. Scale bar – 5 mm. A representative  
1184 image (out of n = 3 experiments) is shown.

- 1185 D. 3D re-construction of microCT X-Ray analysis revealing mineral distribution in  
1186 a 5-day old *P. aeruginosa* PA14 colony. Color indicates intensity, with green  
1187 representing the densest mineral. Scale bar – 0.2 mm. A representative image  
1188 (out of n = 3 experiments) is shown.
- 1189 E. Light microscopy images of 5 day-old *M. abscessus* biofilm colonies, grown on  
1190 B4 agar, supplemented with either calcium acetate (0.25% v/v), or 1.5 mM  
1191 EDTA, as indicated. Scale bar – 5 mm. A representative image (out of n = 3  
1192 experiments) is shown.
- 1193 F. 3D re-construction of microCT X-Ray analysis revealing mineral distribution in  
1194 a 5-day old *M. abscessus* colony grown on B4 agar with calcium. Color  
1195 indicates intensity, with green representing the densest mineral. Scale bar –  
1196 0.1 mm. A representative image (out of n = 3 experiments) is shown.

1197

1198 **Figure 4: Inhibition of cellular pathways leading to calcium carbonate**  
1199 **production disrupts biofilm development in *P. aeruginosa* and *M. abscessus*.**

- 1200 A. A schematic representation of the chemical reaction leading to calcium  
1201 carbonate production, with the inhibitors used in this study indicated in  
1202 parenthesis next to the step they inhibit.
- 1203 B. Light microscopy images of 3-day-old *P. aeruginosa* PA14 biofilm colonies  
1204 grown on TB agar containing the inhibitors indicated in (A) as follows: untreated  
1205 (NT), 1.5 mg/ml DTNB, 1.75 mg/ml AHA, 2.5 mg/ml Diamox and 0.01 mg/ml  
1206 SMV. Scale bar – 2 mm. A representative image (out of n = 3 experiments) is  
1207 shown.
- 1208 C. The effect of inhibiting calcium carbonate production on planktonic growth of *P.*  
1209 *aeruginosa* PA14. Bacteria were grown shaking in liquid TB medium,  
1210 supplemented with: 1.5 mg/ml DTNB, 1.75 mg/ml AHA, 2.5 mg/ml Diamox and  
1211 0.01, 0.05 and 0.01 mg/ml SMV, or untreated (NT). Growth was monitored by  
1212 measuring OD600 in a microplate reader every 30 min. Results are averages

1213 of six wells, bars represent standard deviations. A representative experiment  
1214 (out of n= 3 experiments) is shown.

1215 D. Light microscopy images of 4-day-old biofilm colonies of wild type *P.*  
1216 *aeruginosa* PA01 and indicated mutants grown on BHI agar: carbonic  
1217 anhydrases (*psCA1* – PA0102, *psCA2* - PA2053, *psCA3* – PA4676) and  
1218 calcium channel ( $\Delta$ *ca/C*). A representative experiment (out of n= 3  
1219 experiments) is shown. Insert – the indicated mutant strains were grown  
1220 planktonically in shaking liquid BHI medium. Growth was monitored by  
1221 measuring OD600 in a spectrophotometer at indicated times. Results are  
1222 averages of 4 wells, bars represent standard deviations. Scale bar – 2 mm. A  
1223 representative experiment (out of n= 3 experiments) is shown.

1224 E. Crystal violet assay quantifying biofilm formation of *P. aeruginosa* PA14, grown  
1225 in BHI supplemented with the indicated inhibitors. Results are averages and  
1226 standard deviation of three independent experiments. P values, as determined  
1227 by student's t-test are indicated (\* pVal <0.01, \*\* pVal <0.001, when compared  
1228 to the untreated control).

1229 F. Crystal violet assay quantifying biofilm formation of wild type and indicated  
1230 mutant derivatives of *P. aeruginosa* PA01, grown with in liquid BHI medium.  
1231 Results are averages and standard deviation of three independent  
1232 experiments. P values, as determined by student's t-test are indicated (\* pVal  
1233 <0.01, when compared to the untreated control).

1234 G. Light microscopy images of 5 day-old *M. abscessus* biofilm colonies, grown on  
1235 B4 agar supplemented with calcium and 2.5 mM of the indicated inhibitors or  
1236 untreated (NT). A representative experiment (out of n = 3) experiments is  
1237 shown. Insert – *M. abscessus* was grown planktonically in liquid B4 medium.  
1238 Growth was monitored by measuring OD<sub>600</sub> in a spectrophotometer at indicated  
1239 times. Scale bar – 2 mm. Results are averages of three independent repeats,  
1240 bars represent standard deviations.

1241 H. Light microscopy images of 3-day-old *P. aeruginosa* PA14 biofilm colonies  
1242 grown on SCFM agar, either untreated (NT) or supplemented with 700 mM CaCl<sub>2</sub>

1243 and EGTA, as indicated. Scale bar – 5 mm. A representative experiment (out  
1244 of n = 3) experiments is shown.

1245

1246 **Figure 5: Inhibition of urease prevents biofilm formation and tissue**  
1247 **deterioration in an ex-vivo lunge model**

1248 A. and B. Fluorescent microscopy images of 10 micron slices of lung tissues,  
1249 infected with *P. aeruginosa* PA14 and treated with AHA, as indicated. (A) Blue  
1250 – lung cell nuclei stained by DAPI, (magnification x20). (B) Green - GFP  
1251 expressing *P. aeruginosa*, (magnification x40). A representative experiment  
1252 (out of n = 3) experiments is shown.

1253 C. Light microscopy images of 7 micron slices of lung tissue. Samples were  
1254 treated as in (A), and stained with hematoxylin and eosin (H&E). Blue – nuclei,  
1255 red – extracellular matrix and cytoplasm, (magnification x40). A representative  
1256 experiment (out of n = 3) experiments is shown.

1257 D. Quantification of lung viability. Lung tissue cultures were infected with *P.*  
1258 *aeruginosa* PA14 and treated with AHA, as indicated. ImageJ 1.51g software  
1259 was used to automatically count lung cell nuclei in 4 randomly chosen fields for  
1260 each treatment. P values, as determined by student's t-test are indicated (\*\*  
1261 pVal <0.001).

1262 E. CFU analysis of *P. aeruginosa* PA14 infecting lung tissue and surrounding  
1263 media, with and without treatment. P values, as determined by student's t-test  
1264 are indicated (\* pVal <0.01, \*\* pVal <0.001, when compared to the untreated  
1265 control).

1266 F. Quantification representing the ratios of tissue to medium CFU in (E).

1267

1268 **Figure 6: Inhibition of calcium carbonate production prevents biofilm**  
1269 **formation and tissue deterioration in an ex-vivo lunge model**



- 1270 A. Light microscopy images of 7 micron slices of lung tissues infected with *P.*  
1271 *aeruginosa* PA14 and treated with biomineralization inhibitors as indicated.  
1272 Samples were stained with H&E. Blue – nuclei, red – extracellular matrix and  
1273 cytoplasm, (magnification x40). A representative experiment (out of n = 3)  
1274 experiments is shown.
- 1275 B. CFU of *P. aeruginosa* PA14 infecting lung tissue culture and surrounding media  
1276 with and without indicated inhibitors (as in A). P values, as determined by  
1277 student's t-test are indicated (\* pVal <0.01, \*\* pVal <0.001, when compared to  
1278 the untreated control).
- 1279 C. Quantification of lung viability. Lung tissue cultures were infected with *P.*  
1280 *aeruginosa* PA14 and treated with biomineralization inhibitors as indicated.  
1281 ImageJ 1.51g software was used to automatically count lung cell nuclei in 4  
1282 randomly chosen fields for each treatment. P values, as determined by  
1283 student's t-test are indicated (\*\* pVal <0.001).
- 1284 D. CFU analysis of wild type *P. aeruginosa* PA01 and the indicated mutants  
1285 infecting lung tissue culture and surrounding media. Diamox was applied at 1.1  
1286 mg/ml, when indicated. P values, as determined by student's t-test are  
1287 indicated (\* pVal <0.01, \*\* pVal <0.001, when compared to the untreated  
1288 control).
- 1289 E. Quantification of lung viability. Lung tissue cultures were infected with *P.*  
1290 *aeruginosa* PA14 and treated with biomineralization inhibitors, as indicated  
1291 (Diamox and AHA applied at 1.1 mg/m). ImageJ 1.51g software was used to  
1292 automatically count lung cell nuclei in 4 randomly chosen fields for each  
1293 treatment. P values, as determined by student's t-test are indicated (\*\* pVal  
1294 <0.001).
- 1295 F. *P. aeruginosa* PA14 biofilms were grown for 72 h on TB agar. The colonies  
1296 were physically divided into equal parts, harvested, and half was treated for 2  
1297 h, as indicated. CIP – Ciprofloxacin, 3 mg/ml; GC – gentamycin, 10 mg/ml; AHA  
1298 – 2.5 mg/ml; DTNB – 2 mg/ml. Viability is expressed as the ratio of CFU  
1299 between the treated and the untreated parts of a colony. Results are averages

1300 and standard deviation of three independent experiments. P values, as  
1301 determined by student's t-test are indicated (\*\* pVal <0.001).

1302

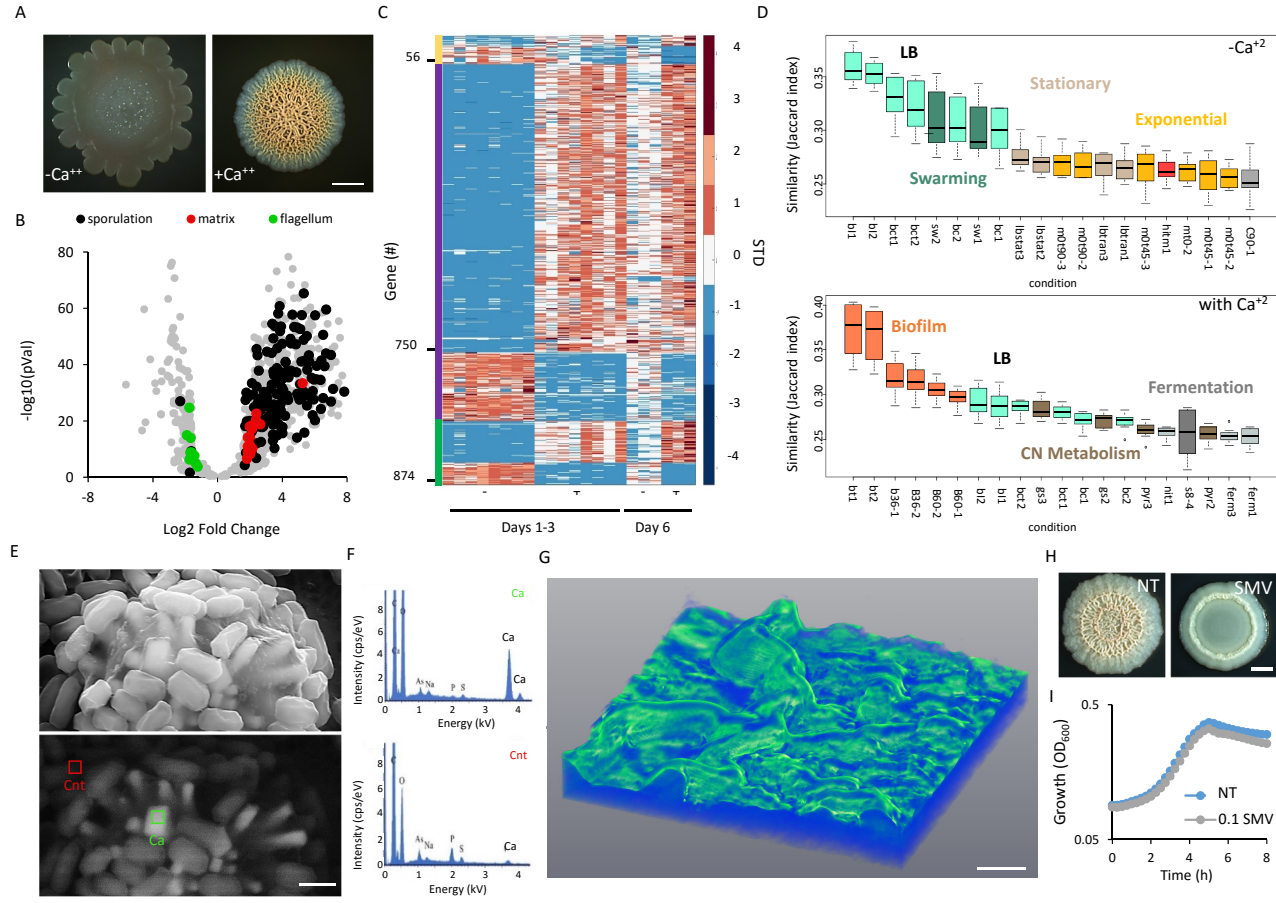

Figure 2

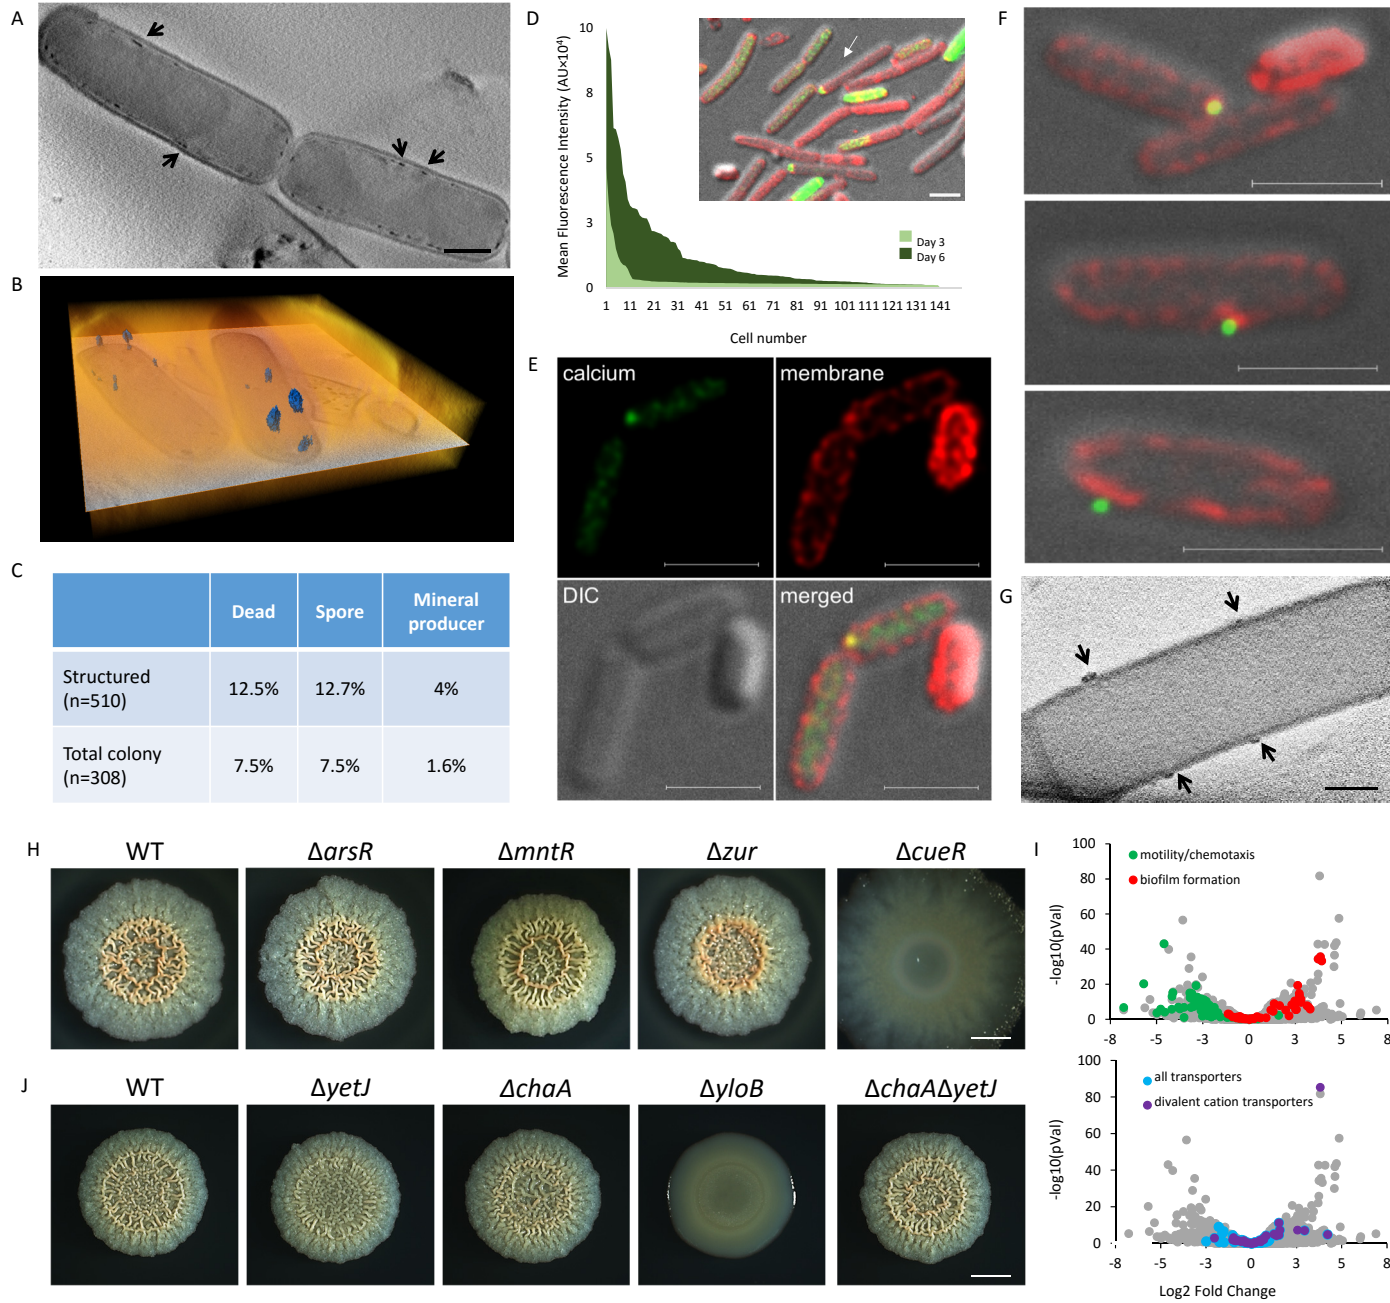

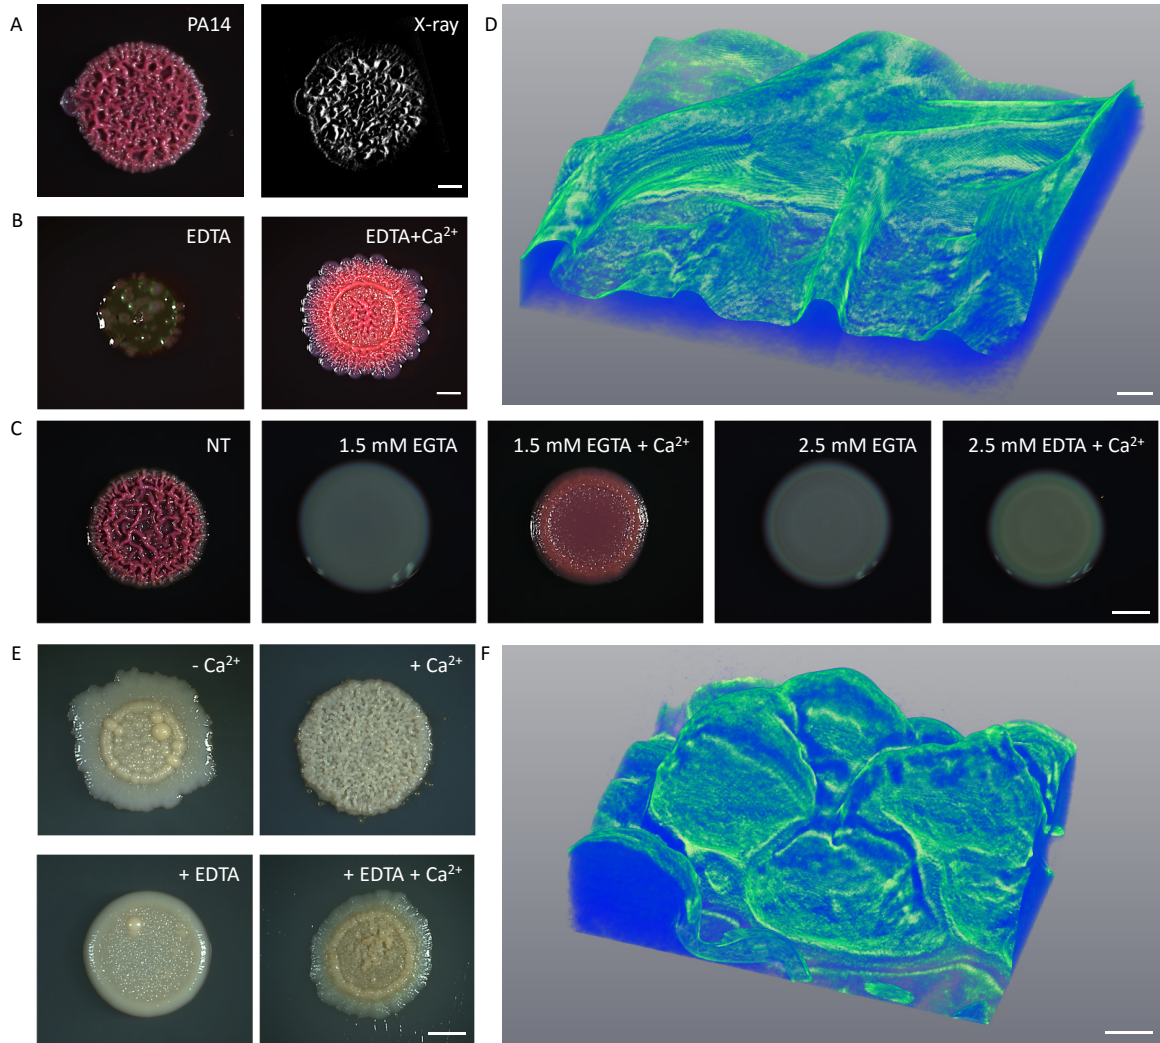

Figure 4

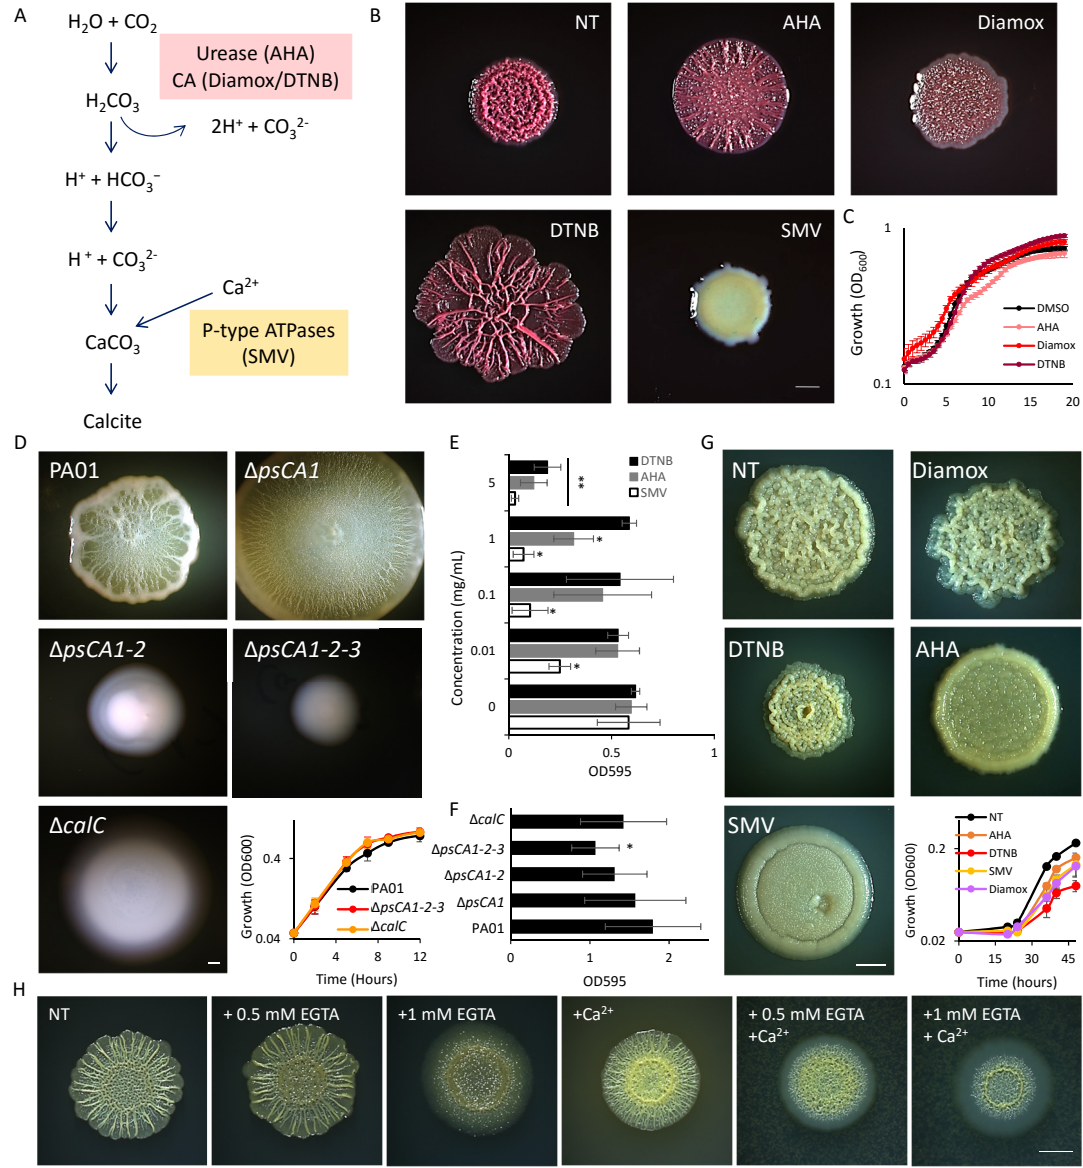

Figure 5

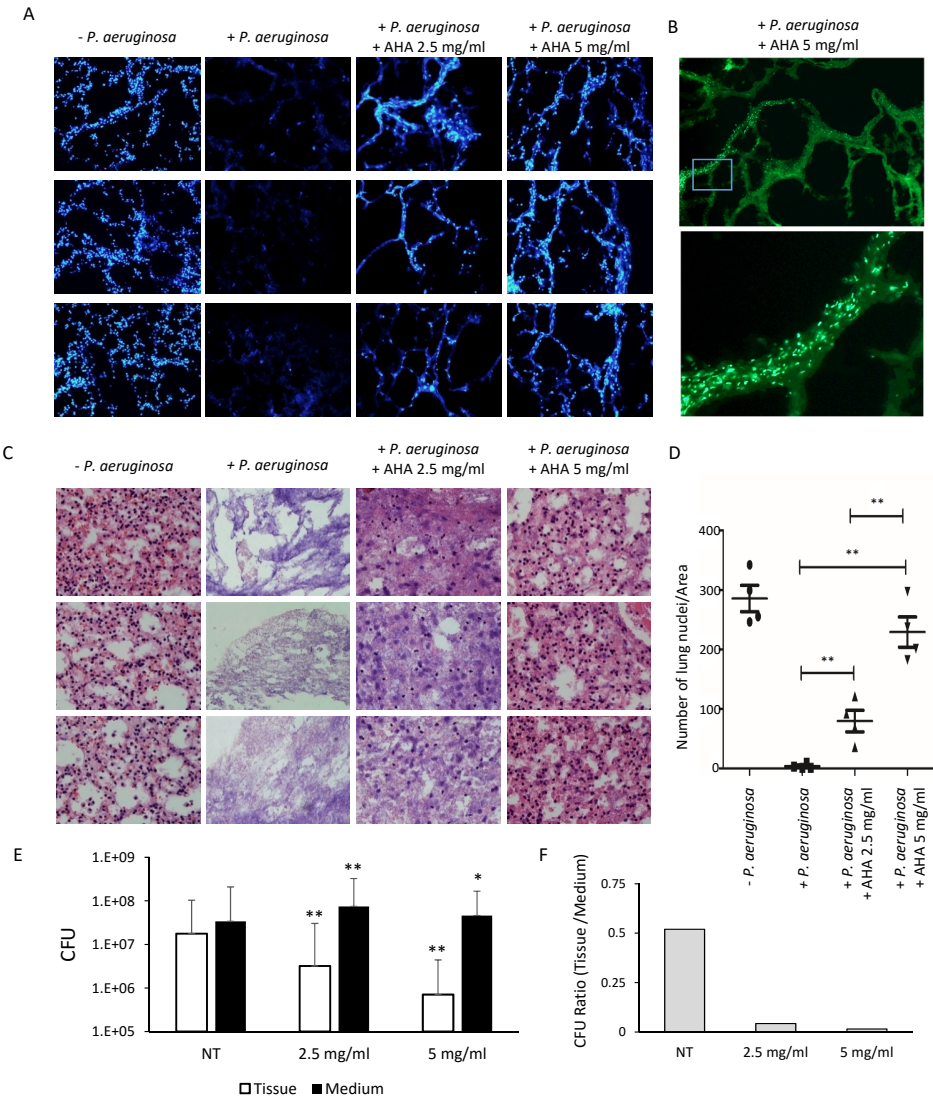

Figure 6

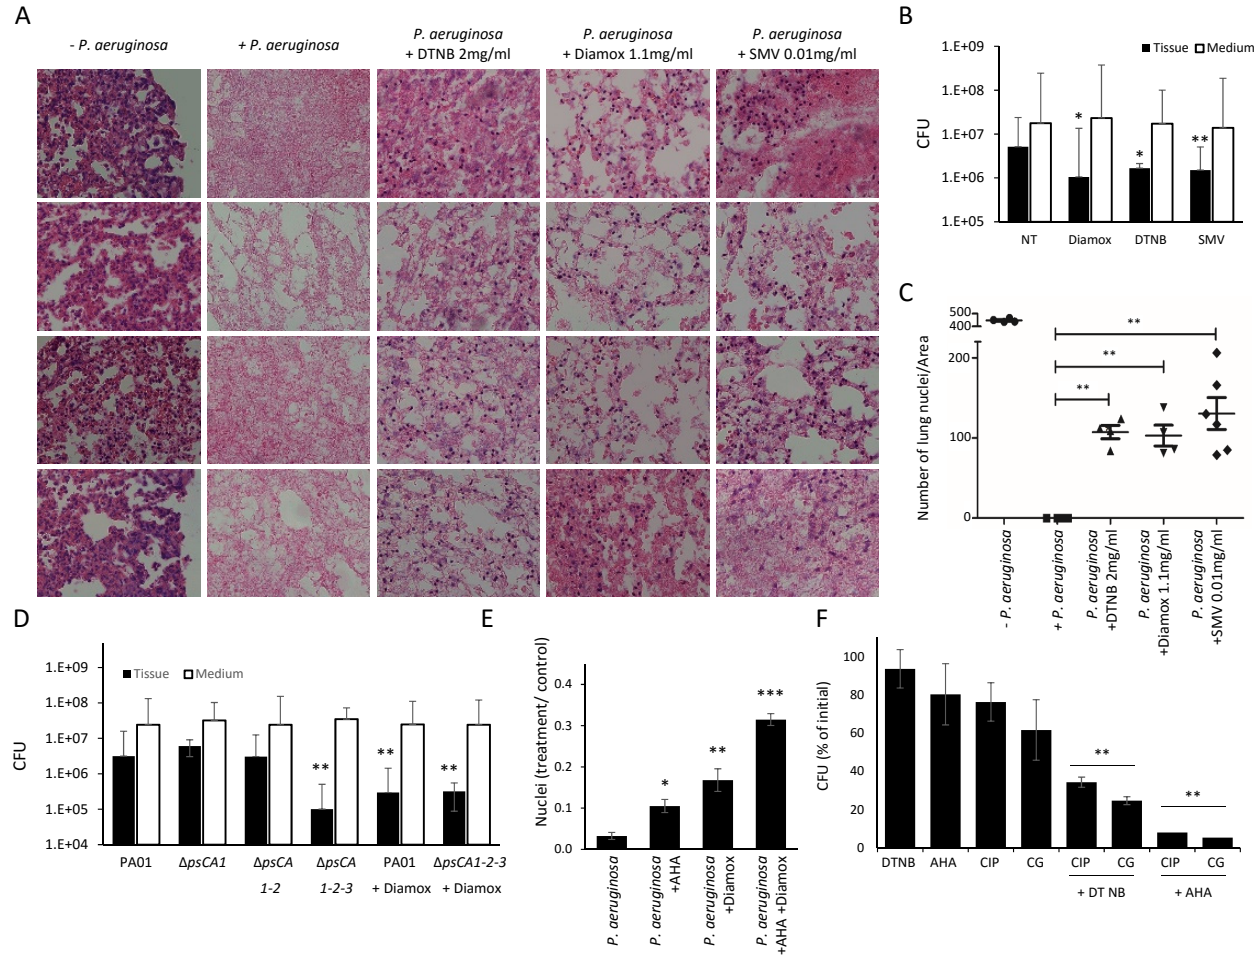



## **The formation of microbial exoskeletons is driven by a controlled calcium-concentrating subcellular niche**

### **Supplementary Information**

#### **Content**

Supplementary Figures

Supplementary Files and Movies Legends

Supplementary Tables

## Supplementary figures

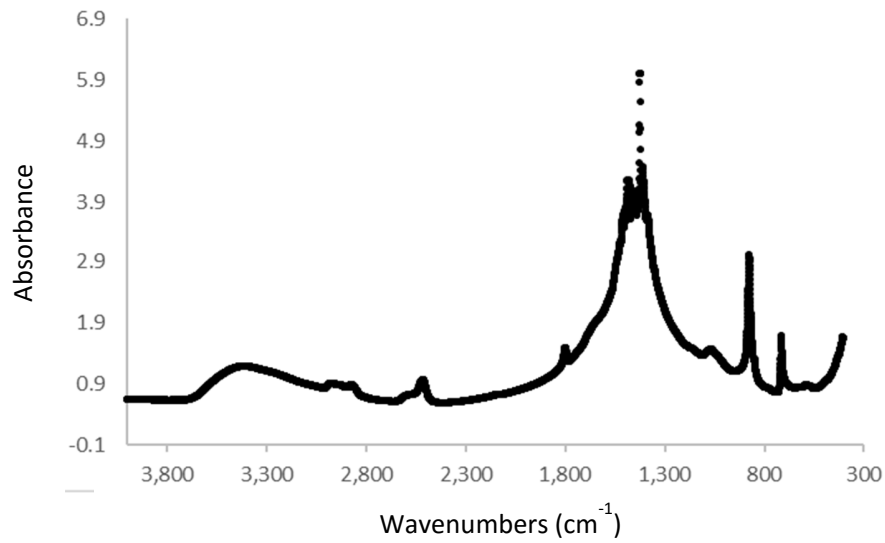

**Supplementary Figure 1.** FTIR spectra of bleached *B. subtilis* biofilm colonies, displaying vibrations characteristic of calcite (crystalline calcium carbonate).

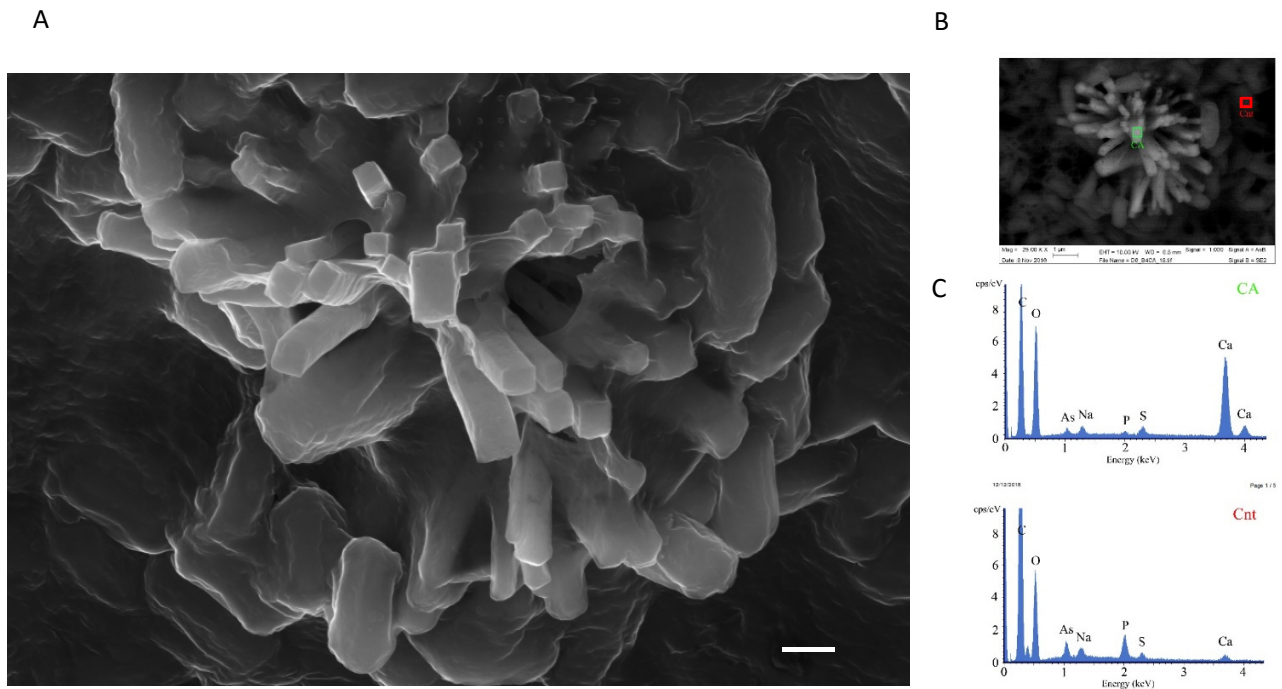

**Supplementary Figure 2. (A).** Scanning Electron Microscopy (SEM) image of *B. subtilis* biofilm colony grown for 6 days on a biofilm-inducing B4-Ca<sup>2+</sup> agar. Shown are the surface of the biofilm and rhombohedral mineral structures in secondary electron mode. Magnification – X25000, scale bar – 1  $\mu$ m. **(B).** Backscattered mode SEM image of the area shown in (A). **(C)** EDX spectra of the area shown in (A). CA – calcium rich area; Cnt – control area. A representative field (out of n=4 fields, from 8 independent experiments) is shown.

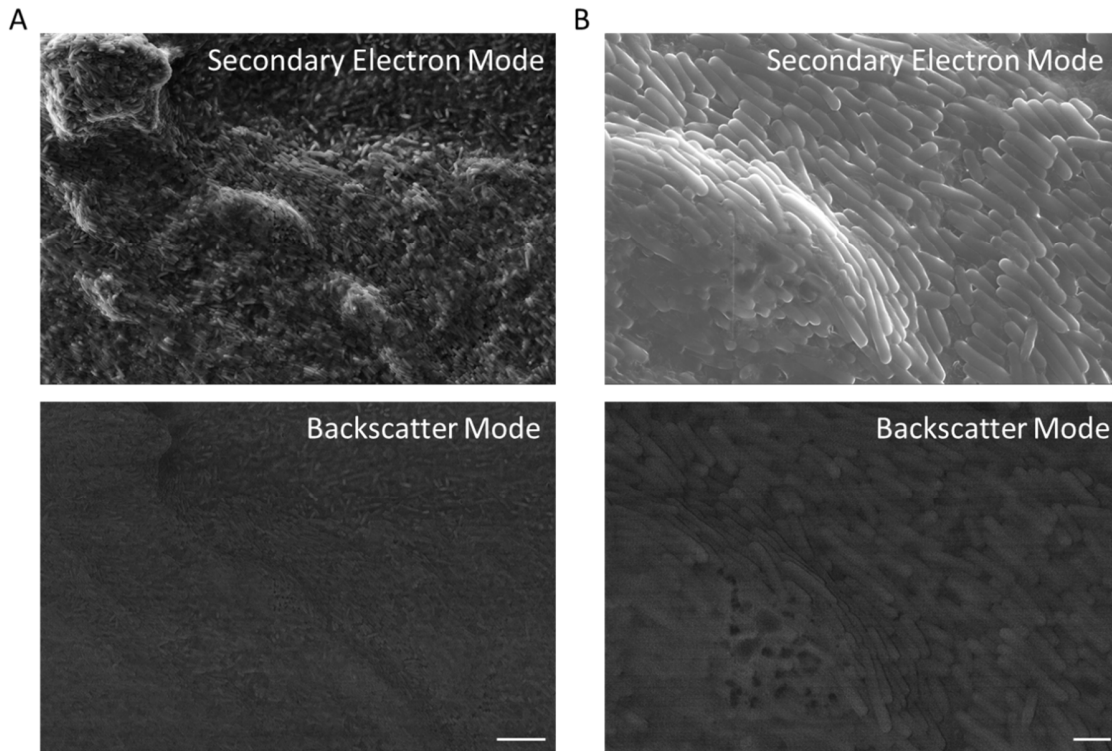

**Supplementary Figure 3.** Scanning Electron Microscopy (SEM) image of *B. subtilis* biofilm colony grown for 6 days on a B4 agar (without excess calcium). Shown are the surface of the biofilm in secondary electron and in backscattered mode of a representative field. **(A)** Magnification – X2500, scale bar – 10  $\mu\text{m}$ . **(B)**. Magnification – X10000, scale bar – 2  $\mu\text{m}$ . Representative fields (out of n=4 fields, from 8 independent experiments) are shown.

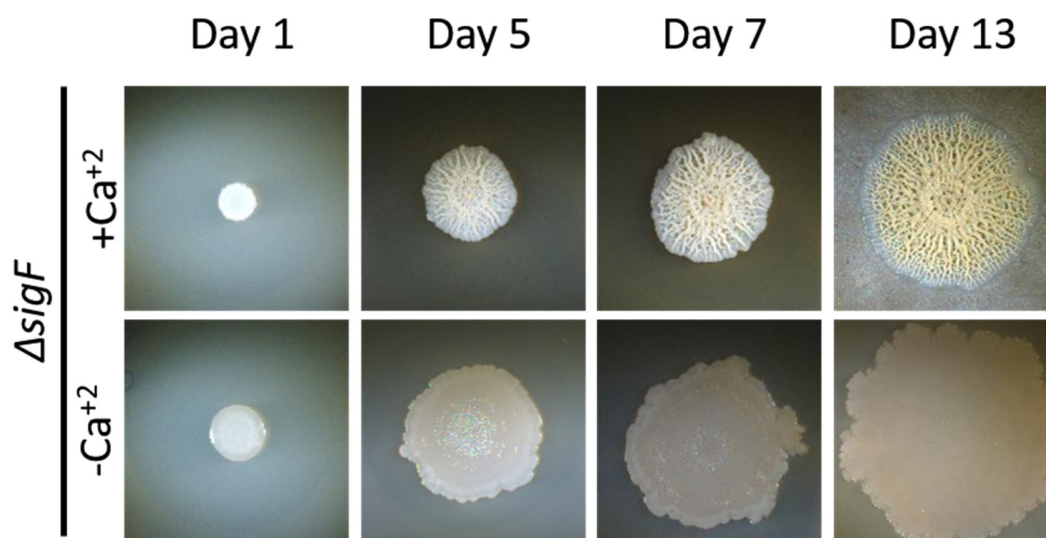

**Supplementary Figure 4.** Light microscopy images of  $\Delta sigF$  mutant strain. Biofilm colonies were grown on B4-Ca<sup>2+</sup> agar for the indicated time at 30°C. The experiment was repeated 3 times, in a technical quadruplicate – and representative images are shown.

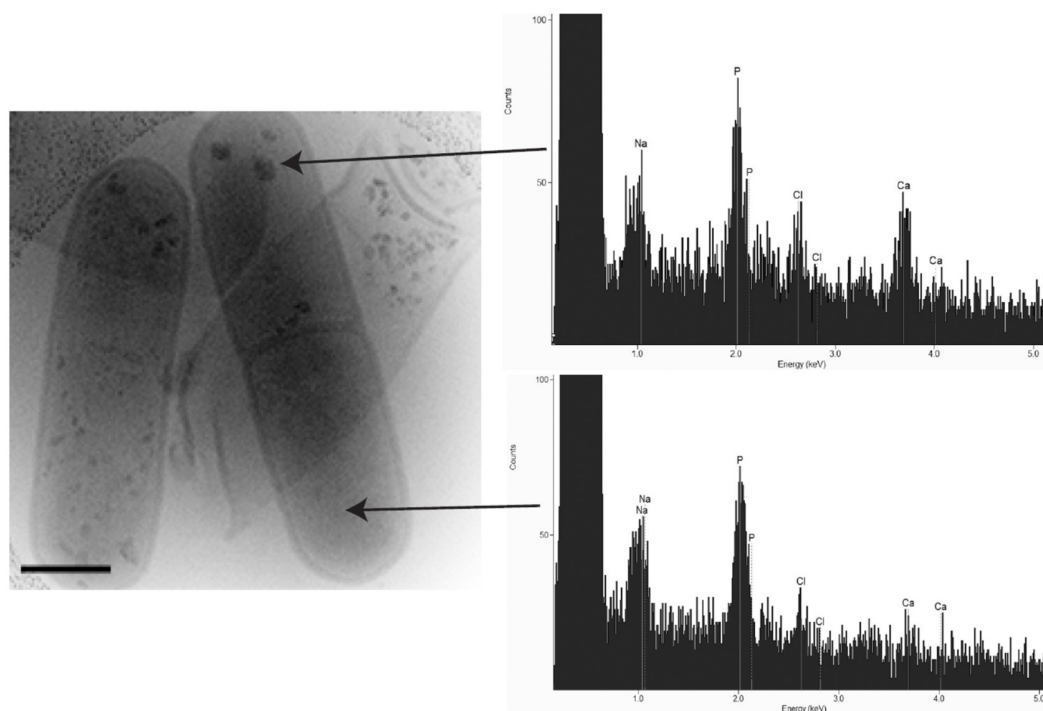

**Supplementary Figure 5.** Left panel - Bright-field STEM image of representative *B. subtilis* biofilm cells from a showing cellular calcium deposits, from a colony grown 10 days on B4- $\text{Ca}^{2+}$  agar. The black arrow indicates the cell used for EDX analysis in panels (B-C). Right panel – EDX analysis of the calcium deposits. A representative mineralizing cell imaged (out of n=50 cells, from 4 independent experiments performed with EDX is shown).

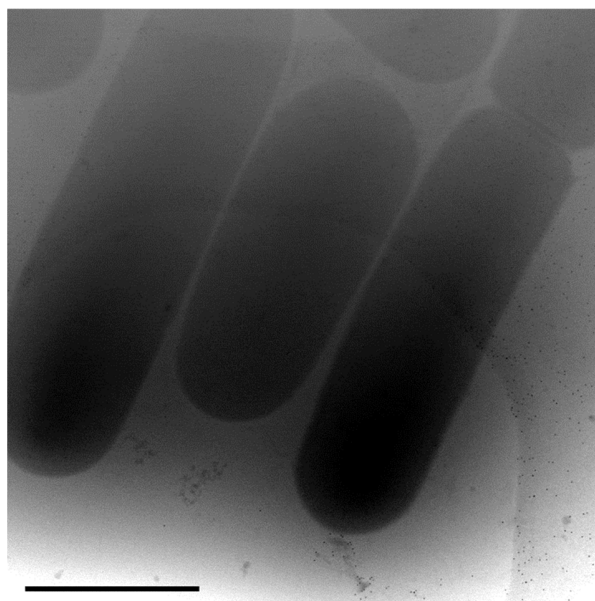

**Supplementary Figure 6.** Cryo-STEM bright-field images of representative biofilm cells from a *B. subtilis* colony grown for 10 days on B4 agar (without calcium). Scale bar 1  $\mu\text{m}$ . A representative field imaged (out of  $n=30$  cells, from 4 independent experiments) is shown.

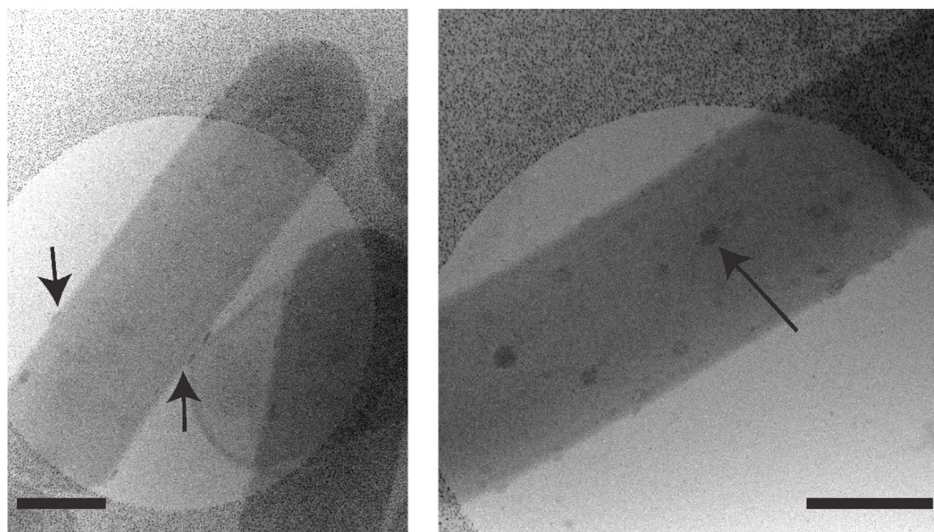

**Supplementary Figure 7.** Cryo-STEM bright-field images of representative biofilm cells from a  $\Delta sigF$  colony grown for 10 days on B4 agar. Black arrows point to aggregates with edge-on views (left panel) and top views (right panel). Scale bars 500 nm. A representative field imaged (out of  $n=30$  cells), from 4 independent experiments is shown.



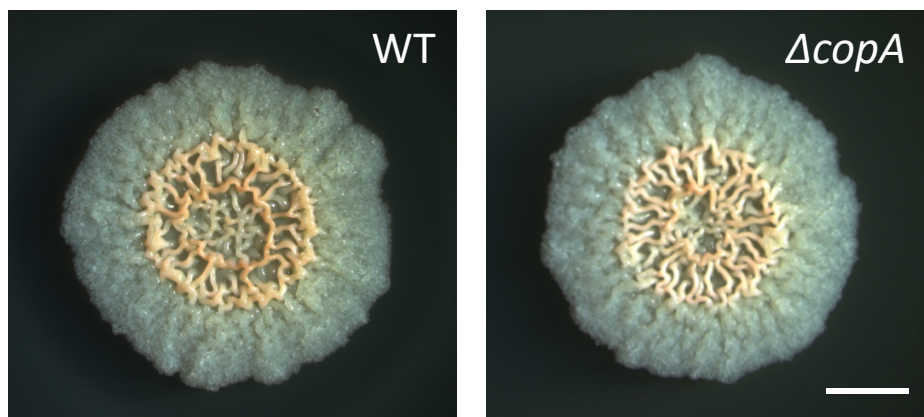

**Supplementary Figure 8.** Light microscopy images of wild type *B. subtilis* (WT) and  $\Delta copA$  mutant. Biofilm colonies were grown on B4-Ca<sup>2+</sup> agar for 3 days at 30°C. Scale bar – 2 mm. The experiment was repeated 3 times, in a technical quadruplicate – and representative images are shown.

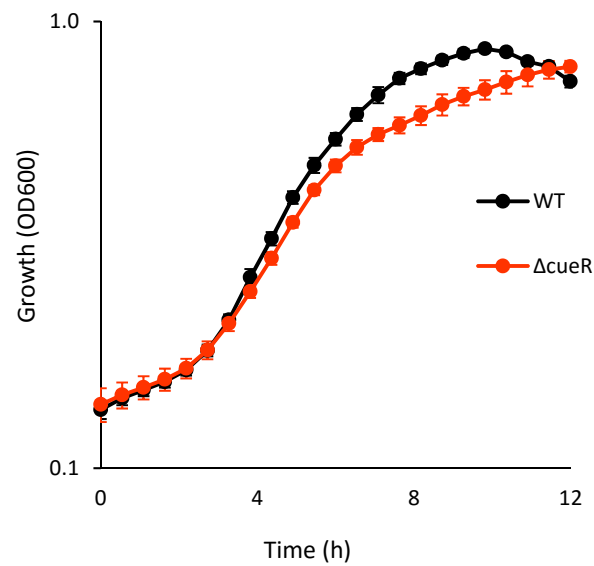

**Supplementary Figure 9.** Planktonic growth assay. Wild type *B. subtilis* (ET) and  $\Delta$ cueR mutant were grown at 30°C with shaking in liquid LB, and growth was monitored by measuring OD<sub>600</sub> in a microplate reader every 30 min. Results are averages of six wells, bars represent standard deviations. A representative experiment out of at least 3 independent experiments is shown.

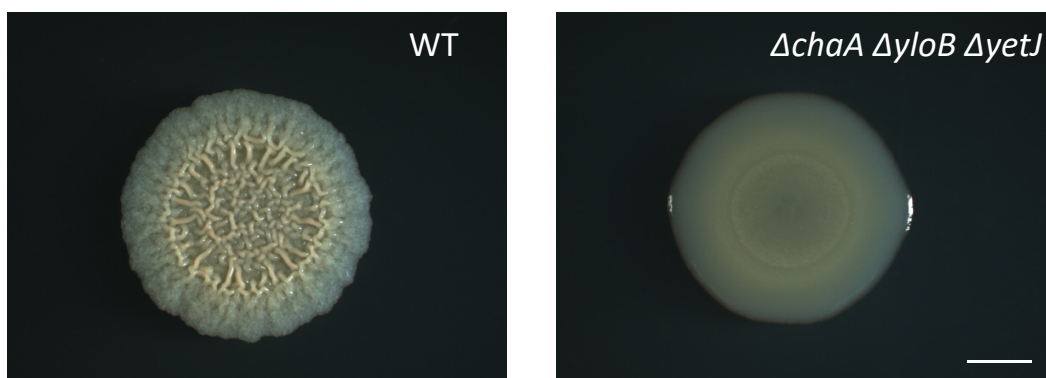

**Supplementary Figure 10.** Light microscopy images of wild type (WT) and triple  $\Delta chaA \Delta yloB \Delta yetJ$  mutant. Biofilm colonies grown on solid B4- $Ca^{2+}$  agar for 3 days at 30°C. Scale bar – 2 mm. The experiment was repeated 3 times, in a technical quadruplicate – and representative images are shown.

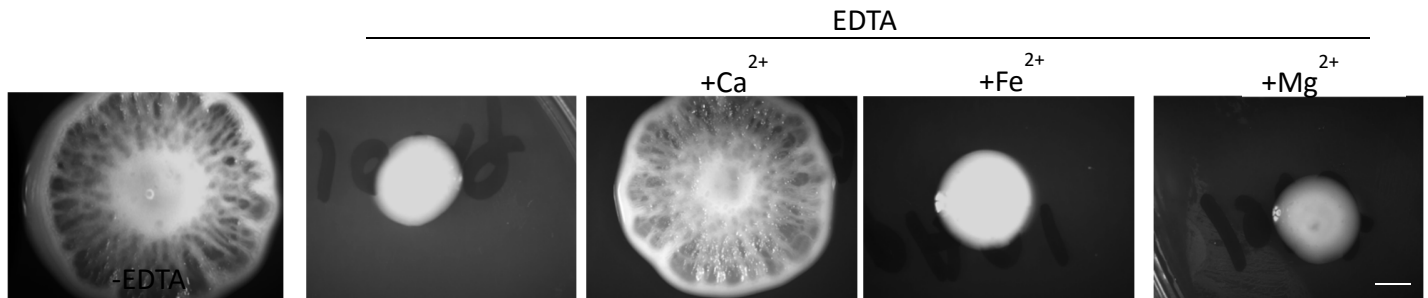

**Supplementary Figure 11.** Light microscopy of biofilm colonies of *P. aeruginosa* PA01 supplemented with EDTA (0.1mg/ml), and divalent ions (1mM), as indicated. Colonies were grown on BHI solid medium for 4 days at 23°C. Scale bar – 5 mm. The experiment was repeated 3 times, in a technical 3 repeats – and representative images are shown.

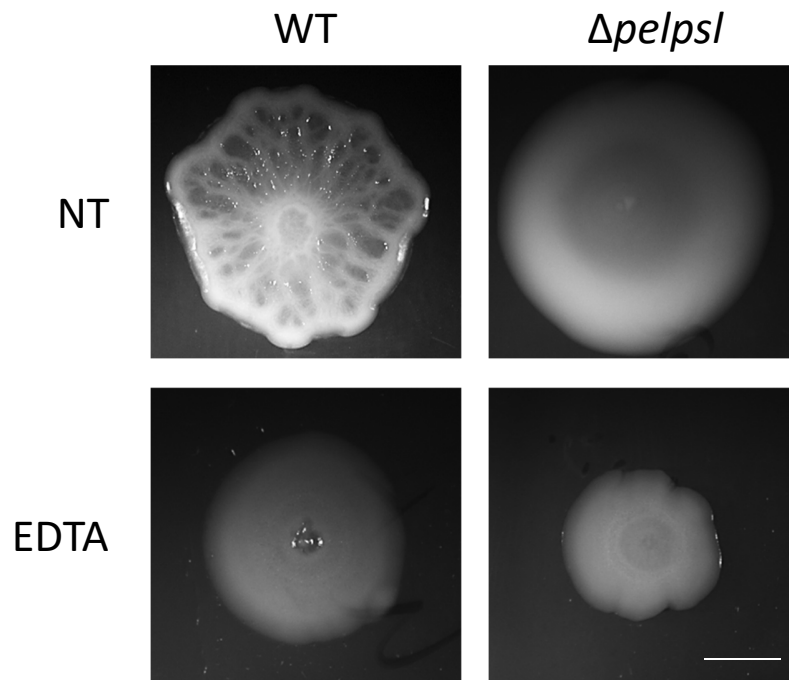

**Supplementary figure 12:** Light microscopy of biofilm colonies of *P. aeruginosa* PA01 either untreated or supplemented with EDTA (0.1mg/ml) as indicated. Colonies were grown on BHI solid medium for 4 days at 23°C. Scale bar = 5 mm. The experiment was repeated 2 times, in a technical 3 repeats – and representative images are shown.

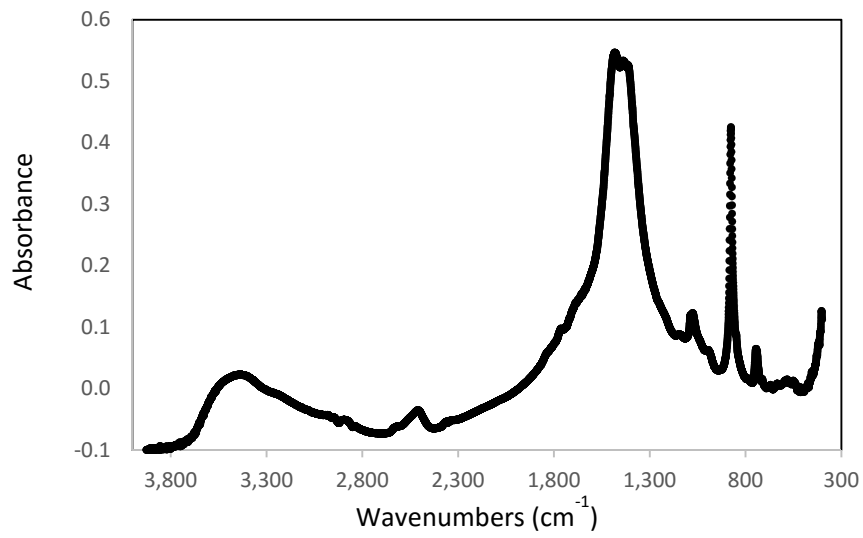

**Supplementary Figure 13.** FTIR spectra of bleached *M. abscessus* biofilm colonies, displaying vibrations characteristic of varterite (crystalline calcium carbonate).

| Bacteria             | Medium             | pH             |                 |                 |                  |               | Medium Langelier Saturation index (LSI) |
|----------------------|--------------------|----------------|-----------------|-----------------|------------------|---------------|-----------------------------------------|
|                      |                    | medium control | far from colony | close to colony | below the colony | colony center |                                         |
| <i>B. subtilis</i>   | B4Ca <sup>2+</sup> | 6              | 7.5             | 7.75            | 7.75             | 8             | 0.51-0.015                              |
| <i>P. aeruginosa</i> | TB                 | 6              | 8               | 8               | 8                | 8             | 2.4–1.4                                 |
| <i>M. abscessus</i>  | B4Ca <sup>2+</sup> | 6              | 8.5             | 8.5             | 8                | 8             | 0.51-0.015                              |

**Supplementary Figure 14.** pH of colonies and the agar medium they were grown on was assessed using pH-indicator strips (MColorpHast™). The experiment was conducted at least twice for each medium, with at least 4 technical repeats. LSI calculation refers to the indicated growth media. ND – undetermined.

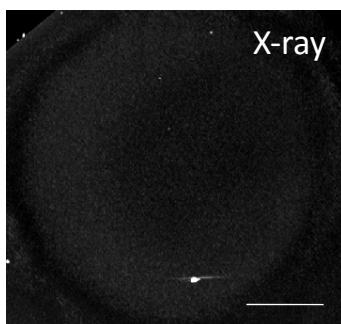

**Supplementary Figure 15.** MicroCT-XRay image of a wild type *P. aeruginosa* PAO14 colony grown for 3 days at 23°C on TB agar containing SMV (0.01 mg/ml). The absence of visible bright areas indicates lack contrast, indicating no dense mineral (compare to the control colony shown in Fig. 3A). Scale bar – 2 mm. The experiment was repeated twice with similar results.



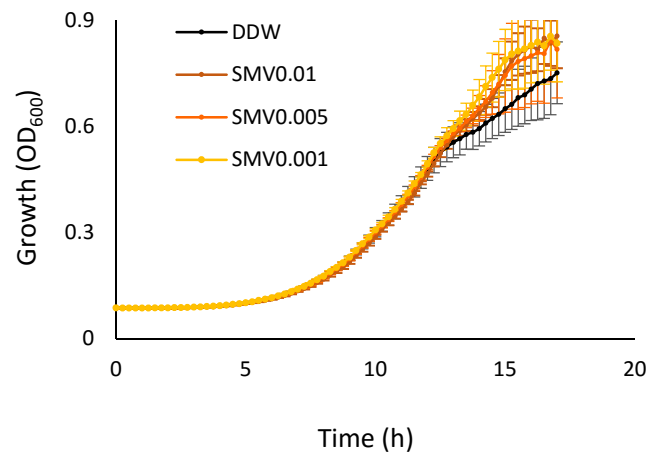

**Supplementary Figure 16.** Planktonic growth assay. *P. aeruginosa* PA14 was grown at 37°C with shaking in liquid TB medium, supplemented with: 1.5 mg/ml DTNB, 1.75 mg/ml AHA, 2.5 mg/ml Diamox and 0.01, 0.05 and 0.01 mg/ml SMV. Growth was monitored by measuring OD<sub>600</sub> in a microplate reader every 30 min. Results are averages of six wells, bars represent standard deviations. A representative experiment out of at least 3 independent experiments is shown.

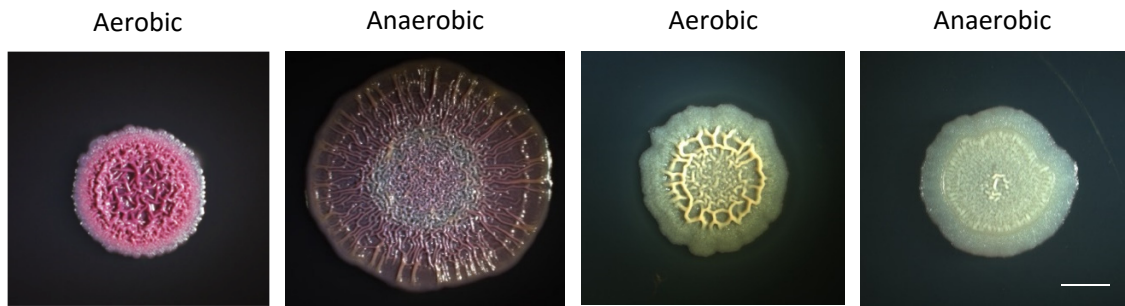

**Supplementary Figure 17.** Light microscopy of biofilm colonies formed by *P. aeruginosa* PA14 (left) and *B. subtilis* (right). The biofilms were grown TB and B4-Ca<sup>2+</sup> agar, respectively, with nitrate source (0.5% KNO<sub>3</sub>). Under aerobic conditions, CO<sub>2</sub> is available from the atmosphere and also produces as a byproduct of aerobic respiration. Under anaerobic conditions of nitrate reduction (as used here - anaerobic growth chamber, a mix of H<sub>2</sub> and N<sub>2</sub> (5/95%), CO<sub>2</sub> is absent from the atmosphere, and aerobic respiration (and subsequent CO<sub>2</sub> emission) is not feasible due to the lack of oxygen. The experiment was repeated 4 times, in a technical 3 repeats– and representative images are shown.

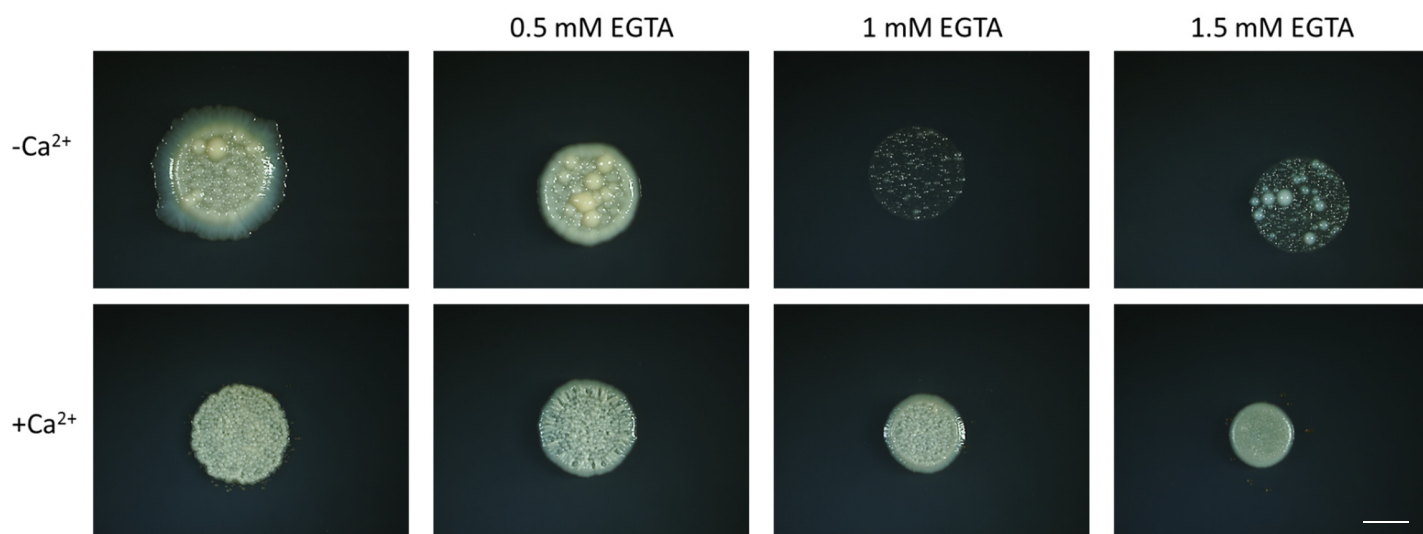

**Supplementary Figure 18.** Light microscopy of 3-day-old biofilm colonies formed by *M. abscessus* on B4 agar supplemented with calcium acetate (0.25% v/v) and EGTA, as indicated. Scale bar = 5 mm. The experiment was repeated 3 times, in a technical 3 repeats—and representative images are shown.

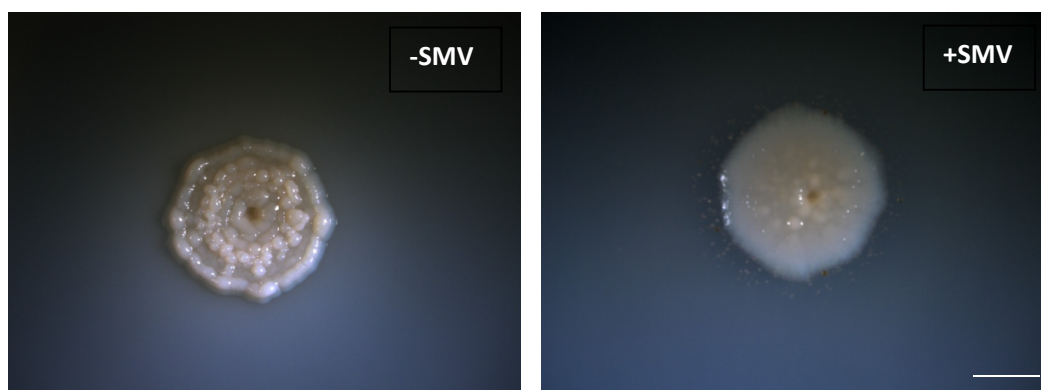

**Supplementary Figure 19.** Light microscopy images of biofilm colonies formed by *M. abscessus*, supplemented with SMV (0.025mg/ml) as indicated. Colonies were grown on B4- $\text{Ca}^{2+}$  medium for 5 days, at 37°C. Scale bar = 5 mm. The experiment was repeated 2 times, in a technical 3 repeats – and representative images are shown.

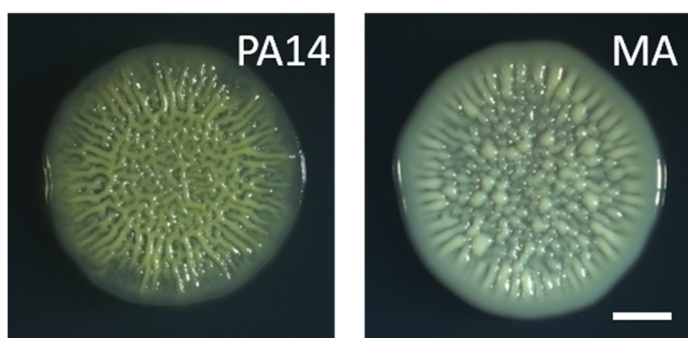

**Supplementary Figure 20.**

*P. aeruginosa* and *M. abscessus* biofilm colonies grown on solid SCFM medium for 4 days at 23°C (*P. aeruginosa*) and 30°C (*M. abscessus* and *S. aureus*). Scale bar – 2 mm. The experiment was repeated 3 times, in a technical 3 – and representative images are shown.

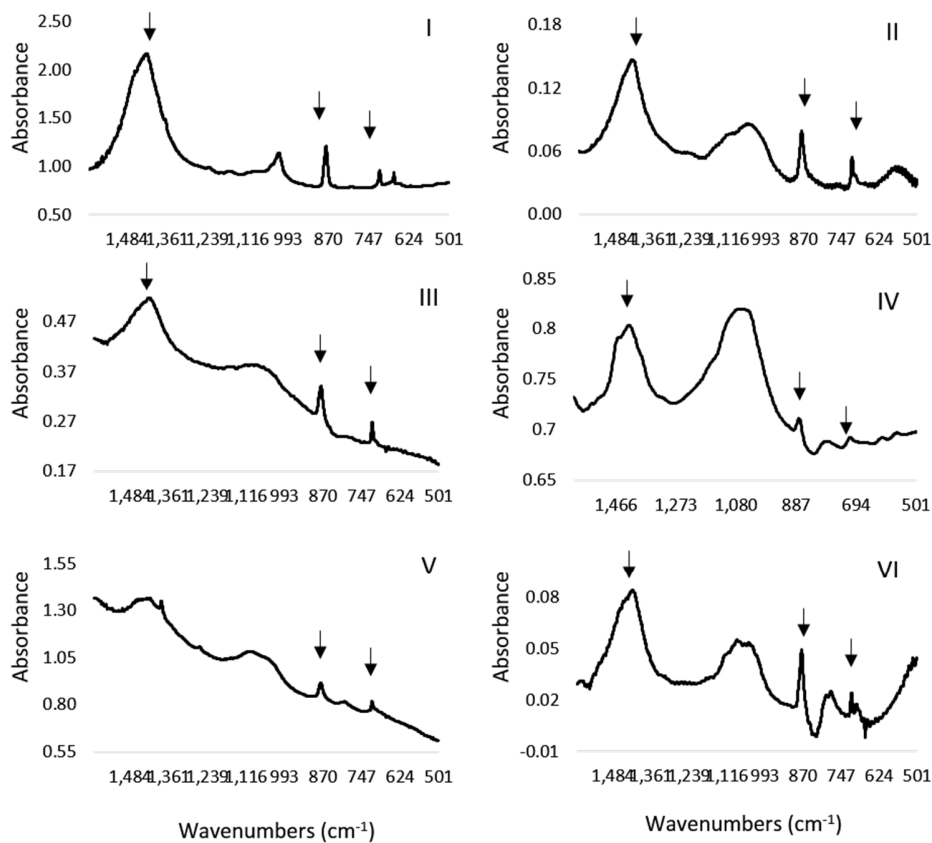

**Supplementary Figure 21.** FTIR spectra of bleached sputum samples of *P. aeruginosa* positive CF patients (I-VI). Arrows indicate vibrations characteristic of calcite. For patient details, see Supplementary table 2.

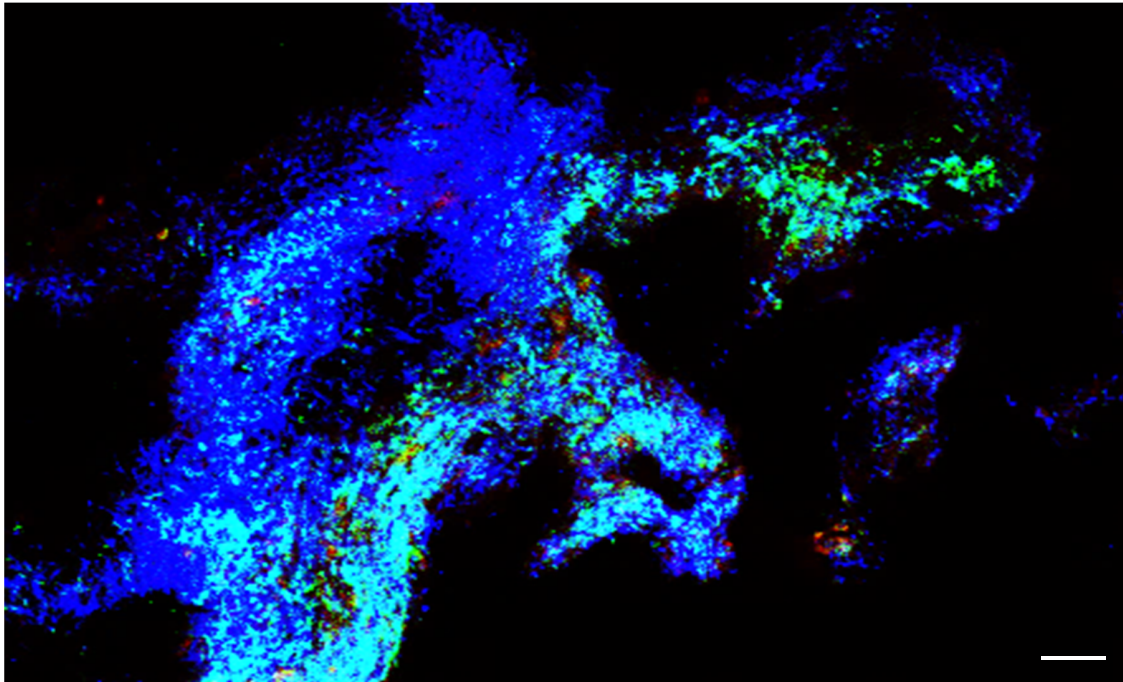

**Supplementary Figure 22.** Confocal image of *ex-vivo* lung model. Lungs were harvested from one-month-old mice, cultured in DMEM containing carbenicillin 100  $\mu\text{g}/\text{ml}$ , and infected with *P. aeruginosa* PA14 constitutively expressing GFP. Green – bacterial cells. Blue - nuclei of lung cells stained with DAPI. Scale bar – 50  $\mu\text{m}$ . The experiment was repeated 3 times, in a technical 4 repeats – and representative image is shown.

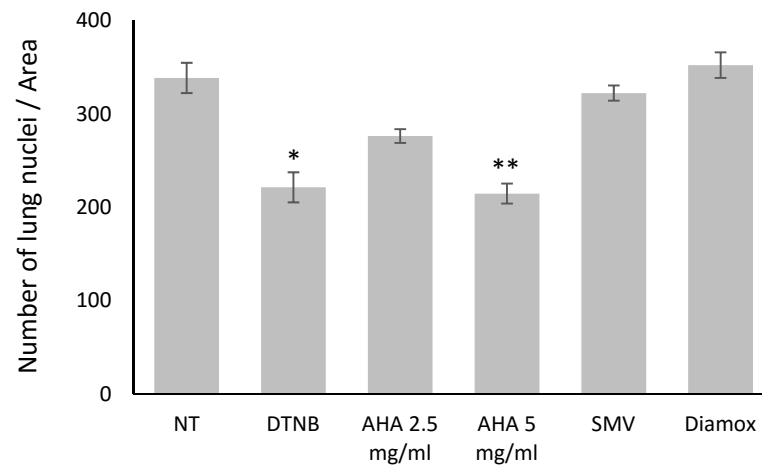

**Supporting Figure 23.** Quantification of lung viability. Lung tissue cultures were treated with biomineralization inhibitors DTNB (2 mg/ml), SMV (0.01 mg/ml), Diamox (1.1 mg/ml) and AHA, as indicated. ImageJ 1.51g software was used to automatically count lung cell nuclei in 4 randomly chosen fields for each treatment. P values, as determined by student's t-test, are indicated (\* pVal <0.01, \*\* pVal <0.001).



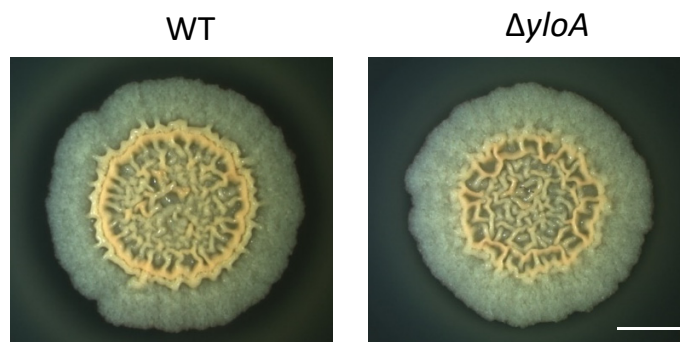

**Supporting Figure 24.** Light microscopy images of wild type (WT) and  $\Delta yloA$  mutant. Biofilm colonies grown on solid B4- $Ca^{2+}$  agar for 3 days at 30°C. Scale bar – 2 mm. The experiment was repeated 3 times, in a technical quadruplicate – and representative images are shown.

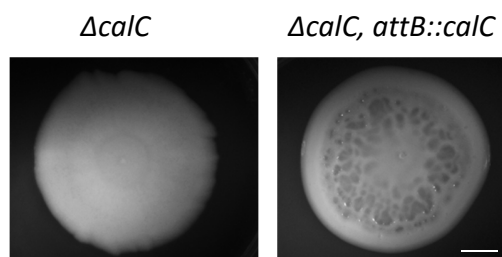

**Supporting Figure 25.** Light microscopy of biofilm colonies of *P. aeruginosa* PA01 indicated strains. Colonies were grown on BHI solid medium for 4 days at 23°C. Scale bar = 5 mm. The experiment was repeated 3 times, in a technical 2 or more repeats – and representative images are shown.

## Supplementary Files:

**Supplementary File 1: Differentially expressed genes in *B. subtilis* NCIB 3610, + vs - calcium.**

**Supplementary File 2: Differentially expressed genes *B. subtilis* NCIB 3610, WT vs *cueR*.**

**Supplementary File 3: Patients information.** Clinical parameters of patients analyzed for presence of calcite in sputum samples.

## Supplementary Movies:

**Supplementary Movie 1: *B. subtilis* colony**

**Supplementary Movie 2: *P. aeruginosa* PA14 colony**

**Supplementary Movie 3: *M. abscessus* colony**

The intact colonies were visualized under X-ray, and the obtained 2D images were used to generate high-resolution 3D image (see Keren-Paz *et al.*, 2018 for details). Rotation of 360° was taken around an axis perpendicular to the biofilm surface. Results are of a representative experiment out of three independent repeats.

## Supplementary Tables:

### Supplementary Table 1: Strains used in this study

| Genotype                                                     | Reference                                                                                     |
|--------------------------------------------------------------|-----------------------------------------------------------------------------------------------|
| <i>Bacillus subtilis</i> NCIB 3610                           | Branda <i>et al</i> (2001)                                                                    |
| $\Delta arsR$ (kan)                                          | This work                                                                                     |
| $\Delta mntR$ (kan)                                          | This work                                                                                     |
| $\Delta zur$ (kan)                                           | This work                                                                                     |
| $\Delta cueR$ (kan)                                          | This work                                                                                     |
| $\Delta copA$ (kan)                                          | This work                                                                                     |
| $\Delta yetJ$ (spec)                                         | This work                                                                                     |
| $\Delta chaA$ (kan)                                          | This work                                                                                     |
| $\Delta yloB$ (mls)                                          | This work, the lack of polar effect was confirmed by the deletion of <i>yloA</i> (Figure S24) |
| $\Delta chaA$ (kan) $\Delta yetJ$ (spec)                     | This work                                                                                     |
| $\Delta chaA$ (kan) $\Delta yetJ$ (spec) $\Delta yloB$ (mls) | This work                                                                                     |
| <i>Pseudomonas aeruginosa</i> PA14                           | Lab collection                                                                                |
| <i>Pseudomonas aeruginosa</i> PA14, Ppuc-GFP (carb)          | 1                                                                                             |
| <i>Pseudomonas aeruginosa</i> PA01                           | Lab collection                                                                                |
| <i>Pseudomonas aeruginosa</i> PA01 $\Delta psCA1$            | 1                                                                                             |
| <i>Pseudomonas aeruginosa</i> PA01 $\Delta psCA1-2$          | 1                                                                                             |
| <i>Pseudomonas aeruginosa</i> PA01 $\Delta psCA1-2-3$        | 1                                                                                             |

|                                                  |                                                                                                                                                                                |
|--------------------------------------------------|--------------------------------------------------------------------------------------------------------------------------------------------------------------------------------|
| <i>Pseudomonas aeruginosa</i> PA01 $\Delta calC$ | This work, This work, the lack of polar effect was confirmed by complementation of <i>calC</i> from an ectopic chromosomal loci (Figure S25), $\Delta calC$ attB:: <i>calC</i> |
| <i>Mycobacterium abscessus</i> ATCC 19977        | A kind gift from Daniel Barkan                                                                                                                                                 |

- 1 Lotlikar, S. R. *et al.* *Pseudomonas aeruginosa* beta-carbonic anhydrase, psCA1, is required for calcium deposition and contributes to virulence. *Cell Calcium* **84**, 102080, doi:10.1016/j.ceca.2019.102080 (2019).

**Supplementary Table 2:**

| <b>Patient</b> | <b>Medical</b> | <b>Gender</b> | <b>CFTR mutations</b> | <b>Infection</b> |
|----------------|----------------|---------------|-----------------------|------------------|
| I 463116       | Carmel         | M             | W1282X/F508           | PA+MA            |
| II A19         | Hadassah       | M             | G542X/F508            | PA               |
| III 463125     | Carmel         | F             | T360K, Q359K          | PA               |
| IV B9          | Hadassah       | F             | W1282X/W1282X         | PA               |
| V A21          | Hadassah       | F             | W1282X/F508           | PA               |
| VI A32         | Hadassah       | M             | W1282X/W1282X         | PA               |

The details of patients included Supplementary Figure 15 and their respected panels are indicated.
